1 **Title: Membrane tension spatially organizes lysosomal exocytosis**

2

3 **Hugo Lachuer<sup>1</sup>, Laurent Le<sup>2</sup>, Sandrine Lévêque-Fort<sup>2</sup>, Bruno Goud<sup>1</sup>, Kristine Schauer<sup>1,3,4</sup>.**

4

5 <sup>1</sup>Cell Biology and Cancer Unit, Institut Curie, PSL Research University, Sorbonne Université, CNRS UMR144, 75005

6 Paris, France

7 <sup>2</sup>Université Paris-Saclay, CNRS, Institut des Sciences Moléculaires d'Orsay, 91405, Orsay, France

8 <sup>3</sup>Tumor Cell Dynamics Unit, Inserm U1279, Gustave Roussy Institute, Université Paris-Saclay, 94800 Villejuif, France

9 <sup>4</sup>Correspondence should be addressed to Kristine Schauer: [kristine.schauer@gustaveroussy.fr](mailto:kristine.schauer@gustaveroussy.fr)

10

11 **Abstract**

12 Lysosomal exocytosis is involved in many key cellular processes but its spatio-temporal regulation is  
13 poorly known. Using total internal reflection fluorescence microscopy (TIRFM) and spatial statistics, we  
14 observed that lysosomal exocytosis is not random at the adhesive part of the plasma membrane of RPE1  
15 cells but clustered at different scales. Although the rate of exocytosis is regulated by the actin  
16 cytoskeleton, neither interfering with actin or microtubule dynamics by drug treatments alters its spatial  
17 organization. Exocytosis events partially co-appear at focal adhesions (FAs) and their clustering is  
18 reduced upon removal of FAs. Changes in membrane tension following a hypo-osmotic shock or  
19 treatment with methyl- $\beta$ -cyclodextrin was found to increase clustering. To investigate the link between  
20 FAs and membrane tension, cells were cultured on adhesive ring-shaped micropatterns, which allows to  
21 control the spatial organization of FAs. By using a combination of TIRFM and fluorescence lifetime  
22 imaging microscopy (FLIM) microscopy, we revealed the existence of a radial gradient in membrane  
23 tension. By changing the diameter of micropatterned substrates, we further showed that this gradient as  
24 well as the extent of exocytosis clustering can be controlled. Together, our data indicate that the spatial  
25 clustering of lysosomal exocytosis relies on membrane tension patterning controlled by the spatial  
26 organization of FAs.

27

28

29

## 1 Introduction

2 Exocytosis is an evolutionary novelty shared among all eukaryotes (i.e. a synapomorphy) (Kloepper et al.,  
3 2007). It relies on the SNARE machinery probably inherited from an archaeal ancestor (Neveu et al.,  
4 2020). In addition to Golgi-derived vesicles along the secretory pathway, late endosomes, lysosomes and  
5 lysosome-related organelles also undergo exocytosis. Lysosomal exocytosis (referred to the secretion  
6 from late endosomes/lysosomes) is involved in the secretion of enzymes (Samie and Xu, 2014) and  
7 exosomes (Kowal et al., 2014). It supports plasma membrane repair (Andrews and Corrotte, 2018) as  
8 well as the remodeling of the microenvironment. Besides these general functions, lysosomal exocytosis  
9 fulfills specific roles in several cell types, such as the growth of neurites (Arantes and Andrews, 2006),  
10 axonal myelination (Chen et al., 2012), cell communication through ATP release in astrocytes (Dou et al.,  
11 2012), pseudopode formation in phagocytosis (Huynh et al., 2007), secretion of cytotoxic granules in  
12 lymphocytes (Peters et al., 1991), MHC-II antigen presentation (Geuze, 1998) and bone resorption in  
13 osteoclasts (Lacombe et al., 2013). It has a fundamental importance in several pathological contexts. For  
14 instance, lysosomal exocytosis is exploited by some  $\beta$ -coronavirus for their egress (Ghosh et al., 2020;  
15 Chen et al., 2021) or by cancer cells to enhance invasion through the secretion of metalloproteases,  
16 especially at invadopodia (Hoshino et al., 2013; Machado et al., 2015). Importantly, impairment of  
17 lysosomal exocytosis has been implicated in lysosomal storage disorders (LSDs) (LaPlante et al., 2006).  
18 Enhancing lysosomal exocytosis to release undigested lysosomal contents is a promising therapeutic  
19 strategy in these diseases (Samie and Xu, 2014).

20 Seminal work on the molecular machinery maintaining exocytosis, particularly vesicular (v-) and target (t-  
21 ) SNAREs that are critical for the fusion of secretory vesicles arriving at the plasma membrane (PM)  
22 (Novick et al., 1980; Söllner et al., 1993; Fernández-Chacón et al., 2001), uncovered key mechanisms that  
23 regulate the frequency of secretory events (Gundelfinger et al., 2003; Kasai et al., 2012). Exocytosis has  
24 been known to be polarized toward active zones in neuronal cells for a long time (Südhof, 2012). In  
25 recent years, the question has arisen where exocytosis takes place and how cells regulate secretion at  
26 specific cellular sites in non-neuronal cells. After some conflicting results (Schmoranzler et al., 2000;  
27 Keller et al., 2001), it has been now clearly demonstrated that exocytosis is not random but clustered  
28 even in non-polarized cells (Sebastian et al., 2006; Yuan et al., 2015; Urbina et al., 2018; Fu et al., 2019).  
29 Evidence also exists that lysosomal intracellular positioning is non-random (Schauer et al., 2010; Ba et al.,  
30 2018). Moreover, in polarized epithelial cells, lysosomal exocytosis is targeted to the basolateral  
31 membrane (Xu et al., 2012). However, the spatial regulation of exocytosis in non-polarized cells and its  
32 mechanisms have not been explored.

33 Lysosomal exocytosis relies on VAMP7 (Martinez-Arca et al., 2000; Proux-Gillardeaux et al., 2007;  
34 Verderio et al., 2012), a v-SNARE that is insensitive to tetanus and botulinum neurotoxins (hence its  
35 other names TI-VAMP for Tetanus neurotoxin Insensitive Vesicle-Associated Membrane Protein) (Galli et  
36 al., 1998). In epithelial cells, VAMP7 interacts with the t-SNAREs syntaxin (STX) 3 (Vogel et al., 2015) and  
37 STX4 (Williams et al., 2014) found at the PM and with STX7. Whereas STX3/4 are involved in exocytosis,  
38 STX7 is only involved in intracellular endosomal fusion events (Ward et al., 2000; Wade et al., 2001;  
39 Bogdanovic et al., 2002).

1 In the present study, we use tools from spatial statistics to analyze live imaging data of fluorescent  
2 VAMP7 obtained by TIRFM on RPE1 cells undergoing lysosomal exocytosis. We report that spatial  
3 organization of lysosomal exocytosis is regulated by membrane tension gradient that relies on the spatial  
4 distribution of FAs.

5

## 6 **Results**

7

### 8 **1) Exocytosis from lysosomes is not random**

9 To monitor lysosomal exocytosis, we transfected RPE1 cells with a pHluorin construct of the v-SNARE  
10 VAMP7, VAMP7-pHluorin. The pHluorin signal is quenched in the lumen of acidic vesicles but  
11 unquenched during exocytosis when protons from the lysosomal lumen are released (F1A). Using  
12 dynamic TIRFM imaging, we manually detected exocytosis events characterized by a sudden increase in  
13 intensity followed by a decay clearly visualized in kymographs (F1B). The decrease in intensity  
14 corresponds to the 2D diffusion of VAMP7-pHluorin in the plane of the PM. Its diffusion kinetic can be  
15 fitted by a single decreasing exponential function with a half-life of about  $1.69 \pm 0.83$ s (S1A-S1B).  
16 Detected exocytosis can be represented by an intensity map where the intensity  $\lambda$  represents the local  
17 expected number of event/ $\mu\text{m}^2$  (F1C). RPE1 cells display a high lysosomal exocytosis rate as several  
18 hundred exocytosis events in a typical cell could be observed within 5min, corresponding to an  
19 exocytosis rate of  $39 \times 10^{-5} \pm 31 \times 10^{-5}$  exocytosis/ $\mu\text{m}^2/\text{s}$  (F1D). VAMP7 has been reported as a marker of  
20 the endosomal/lysosomal compartments. However, it substantially colocalizes with Golgi-derived  
21 vesicles in some cell types (Chaineau et al., 2009), especially in neuronal cells (Burgo et al., 2012). To  
22 confirm that VAMP7 specifically marks lysosomal exocytosis in RPE1 cells, we treated cells with Golgicide  
23 A, an inhibitor of the Arf1 GEF (Guanine nucleotide Exchange Factor) GBF1, which induces Golgi  
24 apparatus dispersion and inhibits the Golgi-derived vesicles secretion (Saenz et al., 2009). As shown in  
25 (F1E), Golgicide A did not significantly alter the exocytosis rate. Contrary, inhibition of the lysosomal V-  
26 type ATPase using Bafilomycin A1 significantly reduced the exocytosis rate (F1F). Lysosomal exocytosis  
27 can be stimulated by histamine through the G1q-PKC pathway (Verweij et al., 2018). As expected,  
28 treating RPE1 cells with histamine significantly increased the exocytosis rate (F1G) immediately after the  
29 addition of histamine (S1C). Taken together, these results demonstrate that VAMP7 exocytosis  
30 represents *bona-fide* lysosomal exocytosis in RPE1 cells.

31 The obtained exocytosis maps can be visualized as patterns of points (F1C). Such patterns can be the  
32 result of an uniformly random process (Complete Spatial Randomness, CSR) or reflects either clustering  
33 (i.e. aggregation) or dispersion (i.e. ordering with an inhibition surface around each point of exocytotic  
34 event) (Diggle, 1983; Lachuer et al., 2020). We obtained a large dataset of 183 cells showing 32 880  
35 exocytosis events to test the CSR hypothesis and to characterize the spatio-temporal properties of  
36 lysosomal exocytosis. The observed spatio-temporal characteristics of exocytosis were compared to CSR  
37 Monte-Carlo simulations (see methods). First, we found that exocytosis events present a smaller  
38 nearest-neighbor distance (NND) than expected in the case of CSR, which indicates clustering at the scale

1 of immediate neighbors (F1H). Moreover, events are more distant to cell borders than expected  
2 demonstrating that exocytosis is much less frequent close to cell borders (F1I). Events are also  
3 anisotropically distributed in the cells *i.e.* have a preferential direction (F1J). To explore this anisotropy,  
4 we seeded cells on rectangular micro-patterns forcing the orientation of cells into two possible  
5 directions (left or right) (S1D). Results confirmed anisotropy in exocytosis and showed that the secretory  
6 direction correlates with the Golgi-Nucleus axis (S1D).

7 The most pertinent tool to analyze a spatial structure is the Ripley's K function that measures the  
8 average number of neighbor events at a given scale. The average curve obtained from observed events  
9 significantly deviated from the expected one in case of CSR, indicating clustering of lysosomal exocytosis,  
10 even at the scale of several micrometers (F1K). The CSR envelope is not symmetric around 0, reflecting a  
11 slight bias introduced by the boundary corrections in the computation of the Ripley's K function. Note  
12 that the treatment with Golgicide A, Bafilomycin A1 and histamine did not change the spatial  
13 organization of exocytosis (S1E-G), indicating that the rate and spatial patterning of exocytosis are  
14 independent features. We noticed a slight correlation between exocytosis rate and clustering (S1H). This  
15 correlation is not due to a bias in the measure, because Ripley's K function is independent on the  
16 number of events (Baddeley et al., 2015) and indeed, conserving an arbitrary percentage of the recorded  
17 events does not affect the Ripley's K function (S1I). We conducted a similar analysis for the temporal  
18 distribution of exocytosis events. The temporal Ripley's K function demonstrates a temporal clustering  
19 (S1J). However, a Fourier analysis revealed that this clustering is not due to a periodicity in the exocytosis  
20 rate (S1K). Lastly, we quantified the coupling between spatial and temporal dimensions using the spatio-  
21 temporal Ripley's K function (S1L), which provides information about the independency of the temporal  
22 and spatial coordinates. This analysis revealed that a substantial proportion of cells presents a spatio-  
23 temporal coupling and among cells with a significant coupling, 82.7% have a positive coupling *i.e.* events  
24 that are close in space are also more likely to be close in time. Together, our analysis confirmed that  
25 lysosomal exocytosis is a non-random process in space and time.

26  
27 **2) Lysosomal exocytosis is coupled to internal focal adhesions in a cytoskeleton-independent**  
28 **manner.**

29 To investigate the mechanisms underlying the spatial clustering of lysosomal exocytosis events, we first  
30 tested whether the t-SNAREs interacting with VAMP7 show clustering, as proposed previously (Xu et al.,  
31 2012). Therefore, we analyzed the spatial patterns of STX3 and STX4 (S2A-C). Although STX3/4 presented  
32 a significant clustering, it was much weaker than the one of exocytosis events, and did not recapitulate  
33 several features of VAMP7 exocytosis such as low frequency close to cell borders and a short scale  
34 clustering. Next, we focused on FAs, shown to be targeted by a subpopulation of lysosomes that were  
35 characterized to be the MAPK scaffolded complex p14-MP1 (p14-MP1+) (Schiefermeier et al., 2014) as  
36 well as by Golgi-derived RAB6+ vesicles (Fourriere et al., 2019). We quantified the co-appearance of  
37 VAMP7-pHluorin with FAs using the FA protein paxillin (Paxillin-mCh) as a marker in co-transfected cells  
38 (F2A-B). The co-appearance index was significantly higher than expected from CSR Monte-Carlo  
39 simulations (F2B). Interestingly, VAMP7 lysosomal exocytosis only appeared at internal FAs, consistent

1 with the observation that exocytosis frequency is low close to cell borders (F2A). To further test the role  
2 of FAs, we cultured cells on Poly-L-Lysine (PLL) substrates to inhibit the formation of FAs (S2D). Under  
3 this condition, the clustering of lysosomal exocytosis decreased significantly (F2C), indicating a role of  
4 FAs in the spatial organization of exocytosis. We noticed that exocytosis rate was significantly enhanced  
5 on PLL substrate, probably due to a smaller adhesive surface under this condition (S2E).

6 FAs are closely linked to both microtubules (MT) (+) ends (Stehbens and Wittmann, 2012; Stehbens et  
7 al., 2014; Seetharaman and Etienne-Manneville, 2019), and the cortical acto-myosin cytoskeleton  
8 (Miklavc and Frick, 2020). Surprisingly, MT depolymerization by nocodazole treatment did not reduce  
9 clustering (F2D) nor the exocytosis rate (F2E). Depolymerisation of F-actin by a low dose of cytochalasin  
10 D significantly reduced the exocytosis rate (F2G), however did not reduce lysosomal clustering (F2F). This  
11 suggested a role of actin in facilitating fusion of lysosomes with PM but not in the organization of  
12 exocytosis patterning. Moreover, myosin-2 (MYH9) inhibition by para-nitro-blebbistatin treatment  
13 affected neither exocytosis clustering nor exocytosis rate (F2H-I). Taken together, these results  
14 demonstrate that FAs regulate lysosomal exocytosis patterns in a cytoskeleton-independent manner.  
15 Moreover, they confirm a targeting of lysosomal secretion events to internal FAs and exclusion from  
16 external ones.

17

### 18 **3) Exocytosis clustering depends on membrane tension**

19 We tested the role of physical parameters, such as membrane tension, known to regulate the exocytosis  
20 rate (Gauthier et al., 2011; Wen et al., 2016; Kliesch et al., 2017; Shi et al., 2018; Wang and Galli, 2018;  
21 Wang et al., 2018). We applied a hypo-osmotic shock and monitored VAMP7 exocytosis 15min after the  
22 shock. Hypo-osmotic shock causes cell swelling leading to an increased membrane tension. VAMP7+  
23 exocytosis has been reported to be less frequent after hyper-osmotic shock (Wang et al., 2018) and  
24 hypo-osmotic shock decreased exocytosis rate in experimental and theoretical models (Zwiewka et al.,  
25 2015; Mao et al., 2021). Surprisingly, the hypo-osmotic shock significantly reduced the exocytosis rate in  
26 RPE1 cells (F3B). However, hypo-osmotic shock significantly increased the clustering of lysosomal  
27 exocytosis (F3A). It also increased the co-appearance between exocytosis events and FAs (F3C). To  
28 further confirm these results, we treated cells with methyl- $\beta$ -cyclodextrin that depletes cholesterol from  
29 the PM, and thus has been proposed to affect membrane tension (Hissa et al., 2017; Biswas et al., 2019;  
30 Cox et al., 2021). Cyclodextrin treatment significantly increases clustering, similarly to hypo-osmotic  
31 shock treatment (F3D). Moreover, cyclodextrin treatment also decreases exocytosis rate (F3E) and  
32 increases the co-appearance between exocytosis events and FAs (F3F).

33 Next, we directly measured membrane tension using the Fluorescence Lifetime Imaging Microscopy  
34 (FLIM) probe Flipper-TR (Colom et al., 2018). The Flipper-TR intercalates in membranes, where the  
35 membrane microenvironment favors one of two possible molecular conformations of the Flipper-TR  
36 (planar or orthogonal). The two conformations display different fluorescence lifetimes. Higher local  
37 membrane tension leads to higher fluorescence lifetimes. We quantified fluorescence lifetime in living  
38 cells using a TIRF-FLIM device under different experimental conditions. We observed that the membrane

1 tension at the ventral part of the cell is not homogeneous in cells seeded on fibronectin-coated surface.  
2 Interestingly, we found that membrane tension presents variability compatible with the micrometer  
3 scale of exocytosis clustering (F3G). Surprisingly, no major variation in the Flipper-TR fluorescence  
4 lifetime was observed following a hypo-osmotic shock or treatment with cyclodextrin (S3A-B). Because  
5 lysosomal clustering is regulated by FAs, we next quantified fluorescence lifetime in living cells seeded on  
6 PLL-coated surface. Despite their difference in exocytosis clustering, the average lifetime was again  
7 similar in these two conditions (F3H). Together, these results indicate that global membrane tension  
8 does not regulate clustering of exocytosis. However, cells grown on fibronectin showed clustering of  
9 similar lifetime values at several regions, whereas these values appeared more homogeneously  
10 distributed in cells on PLL (F3G). Thus, we measured the spatial auto-correlation using the Moran's index,  
11 which increases in case of clustering of pixels values. Moran's index was indeed significantly higher in  
12 cells plated on fibronectin than on PLL (F3I). This suggests that the spatial organization of lysosomal  
13 exocytosis is controlled by regional heterogeneity in membrane tension rather than the global tension at  
14 the whole cell level. Moreover, our results indicate that the presence of FAs favors a  
15 compartmentalization of membrane tension.

16

#### 17 **4) Intracellular coupling between exocytosis probability and membrane tension**

18 A simultaneous observation of the Flipper-TR signal and exocytosis events is technically very challenging.  
19 Therefore, to correlate membrane tension and exocytosis events, we normalized RPE1 cell geometries  
20 using adhesive ring-shaped micropatterns. An advantage of micropatterned cells is the possibility to  
21 standardize the adhesive surface and FA distribution. On ring-shaped micropatterns (F4A), FAs are  
22 formed at the inner and outer borders of the ring mimicking the inner and peripheral FAs found in non-  
23 patterned cells (S4A-B). Using the Ripley's K function, we found that the clustering of lysosomal  
24 exocytosis also occurs in patterned cells, although significantly weaker than in non-patterned cells (F4B).  
25 Plotting the radial average density of exocytosis events demonstrated that cells exhibit an enrichment of  
26 events at half of the cell radius as the density deviated there from the expected CSR case (F4C).  
27 Moreover, exocytosis events are less frequent at cell borders similarly to non-patterned cells. Using the  
28 same micropatterns, we then measured membrane tension by TIRF-FLIM. Interestingly, cells displayed a  
29 radial gradient of membrane tension with lowest membrane tension values at the extreme cell border  
30 and in the center, and a linear increase in membrane tension for the center to the periphery (F4D-E). The  
31 Moran's index is lower in patterned cells than in non-patterned cells despite the presence of the  
32 gradient (S4C). Taken together with the PLL experiments, this result points out a correlation between  
33 clustering/compartmentalization of membrane tension and clustering of exocytosis. The cross-  
34 correlation between the normalized lifetime and the exocytosis probability demonstrates that the  
35 exocytosis probability increases with the membrane tension in a monotonous however non-linear  
36 manner (F4F). Note that the exocytosis probability is defined as the probability of exocytosis at a given  
37 place knowing that an event will occur. Therefore, it does not reflect the exocytosis rate but only its  
38 spatial distribution. The above results together indicate that exocytosis is favored at regions with high  
39 local membrane tension, and that these regions are spatially organized leading to clustering in these  
40 regions.

1  
2  
3  
4  
5  
6  
7  
8  
9  
10  
11  
12  
13  
14  
15  
16  
17  
18  
19  
20  
21  
22  
23  
24  
25  
26  
27  
28  
29

## 5) Strength of membrane tension gradient regulates clustering of lysosomal exocytosis

To further investigate the role of membrane tension in the spatial regulation of exocytosis, we established exocytosis and membrane tension maps of cells cultured on ring-shaped micropatterns of different sizes (F5A). The average membrane tension was found to be similar on all pattern sizes (S5A). However, the membrane tension gradient varied according to the pattern size (F5B), except for cells plated on small patterns that did not display any gradient. Consistently, the Moran's index increased from small to large micro-patterns (S5B). Interestingly, the absence of a gradient in the smallest size micropatterns correlates with a lower level of clustering of exocytosis events, whereas the presence of a gradient in the largest cell size correlates with higher clustering (F5C). On the other hand, the exocytosis rate (normalized to cell surface) was not significantly different regardless of the pattern sizes (S5C). These results confirm a role of the membrane tension gradient in the regulation of spatial exocytosis patterns.

1

2

3

## 4 **Discussion**

5 Our data demonstrate that lysosomal exocytosis is not random (*i.e.* CSR) but clustered in space and time  
6 with a positive coupling between spatial and temporal dimensions (Fig1). Lysosomal exocytosis occurs  
7 close to internal FAs and it is almost absent at cell borders. In agreement with this result, cells seeded on  
8 PLL, which inhibits the formation of FAs, display a decreased clustering of exocytic events (Fig2). Previous  
9 work described a targeting of lysosomes to FAs but exocytosis at these points was not demonstrated  
10 (Schiefermeier et al., 2014). Our data suggest that clustering does not rely on an intact cytoskeleton as  
11 the spatial pattern of lysosomal exocytosis was not perturbed upon treatment with drugs affecting the  
12 cytoskeleton (Fig2). The underlying mechanism supporting clustering of exocytotic events from  
13 lysosomes at FA is likely different from the exocytosis of Golgi-derived vesicles. Indeed, clustering of  
14 Golgi-derived vesicles was shown to be inhibited by both actin and microtubule depolymerization (Yuan  
15 et al., 2015). However, interfering with the actin cytoskeleton inhibits VAMP7-mediated exocytosis rate  
16 in neuronal cells (Gupton and Gertler, 2010). The involvement of the cytoskeleton in clustering of  
17 lysosomal and Golgi-derived exocytosis will then require further investigation in different cell types.

18 We found that interfering with membrane tension by hypo-osmotic shock and methyl- $\beta$ -cyclodextrin  
19 treatments impact clustering of exocytosis, revealing for the first time a role of membrane tension in the  
20 spatial organization of exocytosis (Fig3). Our results complement previous data illustrating the role of  
21 membrane tension on the exocytosis rate (Wen et al., 2016; Kliesch et al., 2017; Shi et al., 2018; Wang  
22 and Galli, 2018; Wang et al., 2018; Cohen and Shi, 2020).

23 A previous study reported that in addition to changing total membrane tension, methyl- $\beta$ -cyclodextrin  
24 treatment increases its heterogeneity (Biswas et al., 2019). In addition, transmembrane proteins such as  
25 FAs have been proposed to behave as obstacles to the lipid flow that equilibrates membrane tension  
26 (Cohen and Shi, 2020). Cells seeded on PLL reveal a more uniform membrane tension, confirming the  
27 role of FAs as obstacles. Together, our data suggest that an inhomogeneity of membrane tension  
28 induced by FAs leads to the accumulation of secretory events at these regions. This hypothesis is  
29 supported by experiments performed on micropatterns, which show that the symmetric arrangement of  
30 FAs leads to a well-defined gradient of membrane tension (Fig.4). Moreover, changing the micropattern  
31 diameter increases the strength of membrane tension gradient and exocytosis clustering (Fig.5).  
32 Interestingly, a gradient in membrane tension has been already observed in moving keratinocytes (Lieber  
33 et al., 2015). Such a gradient could result from the friction between plasma membrane and either actin  
34 treadmilling or the adhesion substrate (Schweitzer et al., 2014). In our experiments performed on non-  
35 migratory cells constrained by adhesion on micropatterns, only actin retrograde flow could potentially  
36 cause friction. Yet, experiments in non-patterned cells revealed that clustering is independent of the  
37 actin cytoskeleton. Thus, the above result could indicate that the diffusion of lipids in the plasma  
38 membrane is very slow, resulting in a stable gradient of membrane tension at the time scale of our



1 experiments, similarly to what was previously observed in non-neuronal cells (Shi et al., 2018). Finally,  
2 the experiments on micropatterns revealed a positive coupling between exocytosis probability and  
3 membrane tension (Fig. 4). Of note, the absence of gradient in membrane tension observed in cells  
4 grown on small micropatterns does not totally abolish exocytosis clustering. This suggests that other  
5 mechanisms regulate clustering, such as for instance clustering of syntaxins. In conclusion, we propose  
6 that the spatial clustering of lysosomal exocytosis relies on the spatial organization of membrane  
7 tension, which is regulated by the presence and localization of FAs.

8

9

10

11

12

13

14

15

16

17

18

19

20

21

22

23

24

25

26

27

28

1

2

3

## 1 Figures Legend

2 **Figure 1. Lysosomal exocytosis is not random but clustered. A.** Schematic representation of the  
3 exocytosis of a VAMP7-pHluorin+ vesicle: the low pH of the acidic lumen quenches the fluorescence of  
4 pHluorin. During exocytosis, protons are released and pHluorin starts to emit light. An exocytosis event is  
5 followed by the 2D diffusion of VAMP7-pHluorin at the plasma membrane. **B.** TIRFM image of VAMP7-  
6 pHluorin in a transfected RPE1 cell. The inset represents the field in the white square showing one  
7 exocytosis event at different time points,  $t=0$  represents the beginning of the exocytosis event. A  
8 kymograph is plotted along the dashed white line and arrowheads indicate several observed exocytosis  
9 events. **C.** Exocytosis intensity map of the cell in B acquired during 5min. Black dots represent exocytosis  
10 events. The color code represents the estimation of the local intensity  $\hat{\lambda}$  expressed in exocytosis/ $\mu\text{m}^2$ . **D.**  
11 Normalized exocytosis rate in RPE1 cells from  $n=183$  cells (and 32.880 exocytosis events) from 34  
12 independent experiments. ( $3.9 \times 10^{-4} \pm 3.1 \times 10^{-4}$  exocytosis/s/ $\mu\text{m}^2$ ). **E.** Exocytosis rate before and after  
13 Golgicide A (10 $\mu\text{M}$ , 30min) treatment;  $n=14$  cells from 3 independent experiments. **F.** Exocytosis rate  
14 before and after bafilomycin A1 (100nM, 60min) treatment;  $n=16$  cells from 3 independent experiments.  
15 **G.** Exocytosis rate before and after histamine (100 $\mu\text{M}$ , no incubation) treatment;  $n=17$  cells from 3  
16 independent experiments. **In E-G,** significance has been evaluated with paired Wilcoxon test, ns  $p>0.05$   
17 and  $***p<0.001$ . **H.** Relative Nearest Neighbor Distance ( $\text{NND}_{\text{observed}}/\text{NND}_{\text{simulated}}$ ) of basal exocytosis  
18 observed in D. **I.** Relative distance to cell borders ( $\text{distance}_{\text{observed}}/\text{distance}_{\text{simulated}}$ ) of basal exocytosis  
19 observed in D. **J.** Relative anisotropy index ( $\text{anisotropy}_{\text{observed}}/\text{anisotropy}_{\text{simulated}}$ ) of basal exocytosis  
20 observed in D. 90% of the cells have a relative anisotropy index superior to 1. **In H-J,** the red dotted line  
21 represents expected value under CSR hypothesis and the significance of the deviation to CSR has been  
22 computed using a t-test.  $***p<0.001$ . **K.** Average centered Ripley's K function ( $K(r)-\pi r^2$ ) of 183 cells (and  
23 32.880 exocytosis events) observed in D. Green curve represents the experimental results  $\pm$  SEM and the  
24 red dotted line the expectation under CSR hypothesis. Red shade represents envelope containing 95% of  
25 CSR simulations.

26  
27 **Figure S1. A.** Exocytosis kinetics monitored by the normalized average fluorescence intensity ( $\pm$  SEM) at  
28 exocytosis event localization. Intensity has been normalized to 1 at  $t=0$  observed at the beginning of the  
29 exocytosis event. The kinetic has been fitted by a single exponential function ( $I(t) = Ae^{-\frac{t}{t_{1/2}}} + B$ )  
30 represented by the black dashed line. The half-life extracted from this fit is  $t_{1/2} = 1.48\text{s}$ . **B.** Half-life  $t_{1/2}$   
31 measured by the same fitting but cell by cell. Average half-life is  $1.69 \pm 0.83\text{s}$ . **C.** Average cumulative  
32 exocytosis events after histamine addition: the y-axis represents the fraction of exocytosis events  
33 observed at a given time over the total number of exocytosis events recorded. Time is normalized  
34 between 0 and 1 and histamine (100 $\mu\text{M}$ ) is added at 0.5 corresponding to the dashed black line. Green  
35 curve represents results before histamine and the blue one after histamine addition. Experimental  
36 curves are averages  $\pm$  SEM;  $n=17$  cells from 3 independent experiments. **D.** Anisotropy assay. VAMP7-  
37 pHluorin/mCh-RAB6A co-transfected cells are seeded on rectangular micropattern (visualized by  
38 fibrinogen Alexa647). Exocytosis axis was established by TIRFM and compared to the nucleus-Golgi axis.  
39 Histogram presents the percentage of cells with co-polarization and anti-polarization;  $n=42$  cells from 4

1 independent experiments. Binomial test,  $*p < 0.05$ . **E.** Average spatial Ripley's K function  $\pm$  SEM before  
2 (green) and after (blue) Golgicide A (10 $\mu$ M, 30min) addition; n=14 cells from 3 independent experiments.  
3 **F.** Average spatial Ripley's K function  $\pm$  SEM before (green) and after (blue) bafilomycin A1 (100nM,  
4 60min) addition; n=16 cells from 3 independent experiments. **G.** Average spatial Ripley's K function  $\pm$   
5 SEM before (green) and after (blue) histamine (100 $\mu$ M, no incubation) addition; n=17 cells from 3  
6 independent experiments. **E-G.** The significance of the difference between Ripley's K functions has been  
7 evaluated using a permutation test (see method) and red-dashed line represents expectation under CSR  
8 hypothesis. **H.** Correlation between the exocytosis rate and the clustering measured as the area under  
9 the Ripley's K function curve between 0 $\mu$ m and 8 $\mu$ m in control cells. Correlation has been evaluated  
10 using Pearson correlation ( $r=0.29$ ) and t-test ( $p=4.279 \times 10^{-5}$ ) for correlation. **I.** Average Ripley's K function  
11 by keeping 25, 50, 75 and 100% of the events for each cell (artificial thinning). Curves represent averages  
12  $\pm$  SEM and red-dashed line represents expectation under CSR hypothesis. **J.** Average centered temporal  
13 Ripley's K function ( $K(t)-2t$ ). Green curve represents the experimental average  $\pm$  SEM and the red dashed  
14 line the expectation under CSR hypothesis. Red shade represents envelope containing 95% of CSR  
15 simulations. **K.** Fourier analysis of the temporal distribution of exocytosis events. Curve represents the  
16 average modulus of FFT. **L.** Median spatio-temporal Ripley's K function ( $K(r,t)$ ) subtracted by the product  
17 of the spatial and the temporal Ripley's K function ( $K(r)$  and  $K(t)$ ). An independency test has been made  
18 cell by cell. Among significant cells, 82.7% present a positive spatiotemporal coupling (and 62.8% among  
19 all cells). In **A-B** and **H-L**, 183 cells from 34 independent experiments were analyzed.

20  
21 **Figure 2. Lysosomal exocytosis is coupled to internal focal-adhesions in a cytoskeleton-independent**  
22 **manner. A.** Merge from TIRFM live cell imaging of a paxillin-mCh/VAMP7-pHluorin co-transfected RPE1  
23 cell: the gray scale image represents snapshot of paxillin-mCh intensity and green dots represent  
24 exocytosis events localization. **B.** Co-appearance index between exocytosis events and FAs. Red dashed  
25 line represents expected co-appearance in the case of CSR. The significance of the deviation to CSR has  
26 been computed using a t-test,  $***p < 0.001$ ; n=49 cells from 4 independent experiments. **C.** Average  
27 spatial Ripley's K function  $\pm$  SEM for cells seeded on fibronectin (green curve) and PLL (blue curve); 36  
28 cells on PLL and 183 cells on fibronectin were analyzed from 3 and 34 independent experiments,  
29 respectively. **D.** Average spatial Ripley's K function  $\pm$  SEM before (green) and after (blue) incubation with  
30 nocodazole (10 $\mu$ M, 60min). **E.** Exocytosis rate before and after nocodazole treatment (10 $\mu$ M, 60min). **D-**  
31 **E:** n=19 cells analyzed from 4 independent experiments. **F.** Average spatial Ripley's K function  $\pm$  SEM  
32 before (green) and after (blue) cytochalasin D treatment (500nM, 60min). **G.** Exocytosis rate before and  
33 after incubation with cytochalasin D (500nM, 60min). **F-G:** 19 cells analyzed from 3 independent  
34 experiments. **H.** Average spatial Ripley's K function  $\pm$  SEM before (green) and after (blue) para-nitro-  
35 blebbistatin treatment (20 $\mu$ M, 15min). **I.** Exocytosis rate before and after para-nitro-blebbistatin  
36 treatment (20 $\mu$ M, 15min). **H-I:** n=13 cells from 3 independent experiments were analyzed. In **C, D, F** and  
37 **H,** the significance of the difference between Ripley's K functions has been evaluated using a  
38 permutation test (see methods) and red-dashed line represents expectation in the case of CSR. In **E, G**  
39 and **I,** the significance has been evaluated using a paired Wilcoxon test, ns  $p > 0.05$ ,  $*p < 0.05$ .

40  
12

1 **Figure S2. A.** STX3/4 immunofluorescence of representative fixed cells seeded on ring-shaped  
2 micropattern. **B.** Average Ripley's K function  $\pm$  SEM of STX3 segmented spots from 28 cells. **C.** Average  
3 Ripley's K function  $\pm$  SEM of STX4 segmented spots from 30 cells. In **B** and **C**, red-dashed line represents  
4 expected curve in the case of CSR, and the red shade represents the envelope containing 95% of CSR  
5 simulations. **D.** Bright-field and TIRFM images of paxillin-mCh transfected cells seeded on fibronectin or  
6 PLL substrate. The cell counters of transfected cells are marked by white dashed lines. **F.** Exocytosis rate  
7 for cells seeded on fibronectin or PLL substrate. 36 cells on PLL and 183 cells on fibronectin were  
8 analyzed from 3 and 34 independent experiments, respectively. The significance has been evaluated  
9 using a t- test, \*\*\* $p < 0.001$ .

10  
11 **Figure 3. Membrane tension regulates lysosomal exocytosis clustering. A.** Average spatial Ripley's K  
12 function  $\pm$  SEM before (green) and after (yellow) hypo-osmotic shock (1:1 dilution, 15min). **B.** Exocytosis  
13 rate before and after hypo-osmotic shock. In **A** and **B**, 22 cells from 4 independent experiments were  
14 analyzed. **C.** Co-appearance index between exocytosis spots and FAs before and after hypo-osmotic  
15 shock. 15 cells analyzed in 3 independent experiments. **D.** Average spatial Ripley's K function  $\pm$  SEM  
16 before (green) and after (dark-red)  $\beta$ -methyl-cyclodextrin addition (5mM, 15min). **E.** Exocytosis rate  
17 before and after  $\beta$ -methyl-cyclodextrin addition. In **D** and **E**, 20 cells from 3 independent experiments  
18 were analyzed. **F.** Co-appearance index between exocytosis spots and FAs before and after  $\beta$ -methyl-  
19 cyclodextrin; 19 cells from 3 independent experiments were analyzed. In **A** and **D**, the significance of the  
20 difference between Ripley's K functions has been evaluated using a permutation test (see method) and  
21 red-dashed line represents expected curve in the case of CSR. In **B**, **C**, **E** and **F**, significance has been  
22 evaluated using paired Wilcoxon test, \*\* $p < 0.01$  and \*\*\* $p < 0.001$ . **G.** TIRF-FLIM images of each 4  
23 representative cells seeded on either fibronectin or PLL substrate, and incubated with Flipper-TR. The  
24 color code represents the Flipper-TR fluorescence lifetime. **H.** Average fluorescence lifetime per cell  
25 seeded on fibronectin and PLL substrate. **I.** Moran's I index per cell seeded on fibronectin and PLL  
26 substrate. In **H** and **I**, significance has been evaluated using t-test, ns  $p > 0.05$  and \*\* $p < 0.01$ , 75 cells have  
27 been analyzed on fibronectin-coated surface, and 80 cells in PLL-coated, from 3 independent  
28 experiments.

29  
30 **Figure S3. A.** TIRF-FLIM images of 4 representative cells in each condition: control, hypo-osmotic shock  
31 (1:1 dilution, 15min) and  $\beta$ -methyl-cyclodextrin (5mM, 15min), all incubated with Flipper-TR. The color  
32 code represents the Flipper-TR fluorescence lifetime. **B.** Average fluorescence lifetime per cell in 3  
33 conditions: control, hypo-osmotic shock and  $\beta$ -methyl-cyclodextrin. The significance has been evaluated  
34 using Kruskal-Wallis test and a *post-hoc* Dunn's test, \* $p < 0.05$ , 67 cells were analyzed in control condition,  
35 43 in hypo-osmotic shock condition, and 41 cells in  $\beta$ -methyl-cyclodextrin, from 5, 3 and 3 independent  
36 experiments, respectively.

37

1 **Figure 4. Coupling between membrane tension gradients and exocytosis probability.** **A.** Representative  
2 epifluorescence image of a 37 $\mu$ m diameter ring-shaped micropattern stained with fibrinogene-Alexa647  
3 and a TIRFM image of VAMP7-pHluorin transfected cell cultured on it accompanied by the average  
4 exocytosis map from 42 cells. The color code represents the probability to observe exocytosis knowing  
5 that one event occurred. **B.** Average spatial Ripley's K function  $\pm$  SEM of exocytosis in cells seeded on  
6 ring-shaped micropattern (blue) and non-patterned cells (green, same data as in F1K). The significance of  
7 the difference between Ripley's K functions has been evaluated using a permutation test (see method).  
8 **C.** Average radial-density  $\pm$  SEM of exocytosis in cells seeded on ring-shaped micropattern. The modulus  
9 (distance to pattern center) is normalized to the cell radius, setting cell border at R=1. The gray rectangle  
10 represents the average position of the adhesive part of the micropattern  $\pm$  SEM. The inset represents the  
11 same data but as a cumulative density function instead of probability density. **A-C:** 42 cells were  
12 analyzed from 9 independent experiments. In **B-C**, the red-dashed line represents expected curve in the  
13 case of CSR and red shade represents envelope containing 95% of CSR simulations. **D.** TIRF-FLIM image of  
14 a representative cell seeded on a ring-shaped micropattern and incubated with Flipper-TR, and average  
15 fluorescence lifetime map from TIRF-FLIM images of 15 cells. The color code represents Flipper-TR  
16 fluorescence lifetime. **E.** Radial average  $\pm$  SEM of the Flipper-TR fluorescence lifetime. Fluorescence  
17 lifetime is presented under a Z-score form (see methods) and the modulus is normalized to the cell  
18 radius setting cell border at R=1. In **D** and **E**, 15 cells analyzed in 1 independent experiment. **F.** Coupling  
19 between exocytosis probability and membrane tension using data from **C** and **E**. The estimation of  
20 exocytosis probability at a given modulus R is based on the number of events normalized by the  
21 corresponding surface, contrarily to **C**. The color code corresponds to the normalized modulus R. Each  
22 point is associated to SEM for both axes.

23  
24 **Figure S4. A.** Representative epifluorescence image of a 37 $\mu$ m diameter ring-shaped micropattern  
25 stained with fibrinogene-Alexa488 and a TIRFM image of paxillin-mCh transfected cells. Arrowheads  
26 show internal FAs. On the right, average paxillin signal (from 19 cells) after denoising. **B.** Average paxillin  
27 radial intensity  $\pm$  SEM. The modulus is normalized to the cell radius setting cell border at R=1. The  
28 intensity is normalized to obtain a total equal to 1, 19 cells were analyzed. **C.** Moran's index for cells  
29 seeded on micropattern or non-patterned fibronectin coated classical culture, 15 cells from one  
30 independent experiment and 42 cells from 9 independent experiments were analyzed, respectively. The  
31 significance has been evaluated using unpaired Wilcoxon test, \*p<0.05.

32  
33 **Figure 5. Strength of membrane tension gradient regulates clustering of lysosomal exocytosis.** **A.**  
34 Representative images of cells seeded on ring-shaped micropattern of different diameters (classified as  
35 small  $\sim$  25 $\mu$ m, medium  $\sim$  35 $\mu$ m and large  $\sim$  45 $\mu$ m) and incubated with Flipper-TR visualized by TIRF-FLIM  
36 (upper panel). The color code represents the Flipper-TR fluorescence lifetime. Average fluorescence  
37 lifetime maps for cells seeded on different diameters (middle panel), maps are an average of FLIM  
38 images from n=16 (small), n=29 (medium) and n=15 (large) cells from 4 independent experiments. Color  
39 code represents Flipper-TR fluorescence lifetime. Average exocytosis maps (lower panel) from n=15

1 (small), n=51 (medium) and n=24 (large) cells from 11 independent experiments. The color code  
2 represents the probability of exocytosis. **B.** Radial averages  $\pm$  SEM of the Flipper-TR fluorescence lifetime  
3 (data from **A**). Lifetime is presented under a Z-score form (see methods) and the modulus is normalized  
4 by the cell radius setting cell border at R=1 for the 3 conditions. **C.** Average spatial Ripley's K functions  $\pm$   
5 SEM of exocytosis in cells seeded on ring-shaped micropatterns with different diameters, small in dark  
6 red, medium in orange and large in yellow (data from **A**). The significance of the differences between  
7 Ripley's K functions has been evaluated using a permutation test (see methods) and p-values were  
8 corrected using Benjamini-Hochberg procedure. The red-dashed line represents expected curve under  
9 CSR hypothesis.

10

11 **Figure S5. A.** Average Flipper-TR fluorescence lifetimes per cell seeded on ring-shaped micropatterns  
12 with different diameters: small, medium and large. Significance has been evaluated using Kruskal-Wallis  
13 test, ns  $p > 0.05$ . **B.** Correlation between the Moran's index per cell and the cell radius (cell seeded on  
14 ring-shaped micropatterns). Correlation has been evaluated using Pearson correlation ( $r = 0.27$ ) and t-test  
15 ( $p = 0.0217$ ) for correlation. In **A** and **B**, 60 cells from 5 independent experiments were analyzed. **C.**  
16 Correlation between the exocytosis rate per cell and the cell radius (cell seeded on ring-shaped  
17 micropatterns). Correlation has been evaluated using Pearson correlation ( $r = -0.08$ ) and t-test ( $p = 0.47$ )  
18 for correlation. 90 cells were analyzed from 11 independent experiments.

19

20

21

22

23

24

25

## 1 **Materials and Methods**

2 **Cell culture:** hTERT-immortalized retinal pigment epithelial cell line (hTERT RPE-1) were cultivated in  
3 DMEM/F12 media (Gibco, catalog # 21041-025) complemented with 10% Fetal Bovine Serum (Eurobio,  
4 catalog # CVFSVF00-01) (without antibiotics). Cells were maintained at 37°C with 5% CO<sub>2</sub> in a humidified  
5 incubator.

6 **Transfection:** Cells were transfected with the following constructs: VAMP7-pHluorin (Chaineau et al.,  
7 2008), mCh-Rab6A and Paxillin-mCh (Fourriere et al., 2019). Cells are transfected with 800ng of DNA (or  
8 2x400ng for co-transfection) using the JetPrime kit (Polyplus). Cells were imaged 24h after transfection.

9 **Drug treatments:** Cells were treated with the following drugs with the given concentration and  
10 incubation time: Golgicide A 10μM 30min (Merck, catalog # G0923), Bafilomycin A1 100nM 1h  
11 (MedChemExpress, catalog # HY-100558), Histamine 100μM no incubation (Merck, catalog # H7125),  
12 Nocodazole 10μM 1h (Merck, catalog # M1404), Cytochalasin D 500nM 1h (Merck, catalog # C8273),  
13 Para-nitroblebbistatin 20μM 15min (Cayman Chemical Company, item 24171), β-methyl-cyclodextrin  
14 5mM 15min (Merck, catalog # C4555). Hypo-osmotic shocks were made by adding water in the media  
15 with a volume ratio of 1:1 and cells were imaged 15min after. For all drug conditions, a paired design has  
16 been used: the same cell is imaged before and after the treatment.

17 **Micropatterning:** We followed the photolithography micropatterning protocol from Azioune *et al.*  
18 (Azioune et al., 2010). Briefly, coverslips (1.5H ThorLabs, Catalog # CG15XH1) were oxidized by plasma-  
19 cleaner (Harrick Plasma) during 5min. Coverslips were PEG-coated by incubating them on a drop of PLL-  
20 g-PEG (Surface Solutions, PLL(20)-g[3.5]- PEG(2)) (0.1mg/ml diluted in water, 10mM HEPES, pH=7.4) in a  
21 moiety chamber during 1h. After coating, patterns were printed using a deep UV lamp (Jelight Company  
22 Inc, catalog # 342-220) with radiation passing through a photomask (DeltaMask) during 5min. Finally,  
23 patterns were fibronectin-coated by incubating coverslips on a drop of fibronectin (Merck/Sigma, catalog  
24 # F1141) (50μg/ml diluted in water) and fibrinogen-Alexa647 (Molecular Probes, Invitrogen, catalog #  
25 F35200) (or fibrinogen-Alexa488) (5μg/ml) in a moiety chamber during 1h. Coverslips were conserved at  
26 4°C in PBS.

27 Cell seeding on micropatterns was described in Lachuer *et al.* (Lachuer et al., 2020). Briefly, coverslips  
28 were maintained in magnetic chamlides for live imaging or kept in a P6 wells for fixation. ~200 000  
29 trypsinized (Thermo Fisher, catalog # 12605010) cells were added in the chamlide chamber. After 10min  
30 incubation in 37°C incubator, cells were attached to the substrate. Cells were washing using DMEM/F12  
31 media with 20mM HEPES (Gibco, catalog # 15630-056) (+ 2% penicillin/streptomycin (Gibco, catalog #  
32 15140-122) if cells were used for lived-imaging). Cells were incubated at least 3h in the incubator until  
33 full spreading on the micropattern. Cells were imaged the same day.

34 Different geometries of micropatterns were used. In figure 4 and S2, ring-shaped micropatterns with a  
35 diameter of 37μm were employed. In figure 5, 3 sizes of ring-shaped micropatterns were used, with  
36 diameters of 25μm, 35μm and 45μm. For all sizes, the thickness of the adhesive ring was 7μm. Figure 5  
37 also includes data of figure 4. Despite these theoretical sizes, a variation in the measured cell diameter  
38 was observed likely due to UV diffraction during the printing. The actual dimensions were systematically



1 measured. During analysis, cells with diameter inferior to 20µm were categorized as “Small”, between  
2 20µm and 38µm as “medium” and superior to 38µm as “large”. In figure S1, rectangular micropattern  
3 has dimensions of 9x40µm.

#### 4 **Microscopy:**

5 *TIRFM*: Non-patterned cells were seeded in fluorodishes (World Precision Instrument) coated with  
6 fibronectin (or PLL (Merck P4707)). DMEM/F12 media + 20mM HEPES was used for imaging. Patterned  
7 cells were prepared as described. Acquisition was made using an inverted Nikon TIRFM equipped with an  
8 EMCCD camera (efficiency 95%) with a 100x objective (pixel size = 0.160µm). The following lasers were  
9 used 491nm, 561nm and 642nm. Time-lapse of VAMP7-pHluorin was acquired with a frame rate of 1  
10 image every 300ms during 5min. Frame rate was set according to the half-life of exocytosis events. Due  
11 to microscopic device delay, the actual frame rate was computed using the computer time of saved files.

12 *TIRF-FLIM*: Images were acquired on a homemade setup based on a x100 1.49 Nikon Objective (Blandin  
13 et al., 2009; Marquer et al., 2011). A 2MHz supercontinuum laser source (SC450 HE-PP Fianium) was  
14 filtered (Excitation filter 482-18, Dichroic Di01-R488, Emission filter Long Pass 488, Semrock) within the  
15 microscope cube to match the dye excitation/emission spectra. The average power in the back focal  
16 place of the objective was between 30 and 100 µW depending on the experiment. The TIRF angle was  
17 finely controlled thanks to a motorized stage which allows one to adjust the pulsed beam focalization in  
18 the back focal plane of the TIRFM objective. Fluorescence images were detected thanks to a time-  
19 resolved detection based on the use of a high-rate imager (Kentech Ltd., UK) optically relayed to a  
20 charge-coupled device camera (ORCA AG, Hamamatsu, binning 2x2). This intensifier was synchronized  
21 with the laser pulse through a programmable delay line (Kentech, precision programmable 50 Ω delay  
22 line), which enables us to open temporal gates with 1 ns width at different times after the pulse, thus  
23 sampling the fluorescence decay. Each time gated image corresponds to an average of 10 images (10 x  
24 250 ms). FLIM maps were thus produced by recording a series of 17 time-gated fluorescence intensity  
25 images and fitting the data for each image pixel to a single exponential decay model by use of a standard  
26 nonlinear least-squares fitting algorithm.

27 *Flipper-TR*: Cells were prepared as for classical TIRFM. 15min before acquisition, Flipper-TR was added in  
28 the media (Spirochrome, Catalog # SC020) (Colom et al., 2018) at a concentration of 1µM. If used, drugs  
29 were added with Flipper-TR. Cells were not washed as recommended. Due to the high variability of the  
30 fluorescence lifetime, a z-score transformation was applied when specified. For each cell, the average µ  
31 and standard-deviation σ of the fluorescence lifetime was computed. Then, each lifetime pixel  $x_i$  value  
32 was reduced and centered:

$$z_i = \frac{x_i - \mu}{\sigma}$$

33 **Immunofluorescence**: Cells were fixed with 4% PFA (Euromedex, catalog # 15710) during 15min and  
34 quenched with a 50mM NH4Cl solution. After PBS washing, cells were permeabilized (and blocked) with  
35 a PBS Saponin (MP Biomedicals, catalog # 102855) (0.5g/l) BSA (Merck, catalog # 10735094001) (1g/l).  
36 Coverslips were incubated during 1h in a moiety chamber at RT with primary antibodies diluted in a PBS

1 2% BSA solution. After PBS washing, coverslips were incubated with a secondary antibody (400x)  
2 conjugated with a fluorophore following the same protocol. Finally, coverslips were mounted with  
3 Mowiol (Biovaley, catalog # MWL4-88-25) and DAPI (Merck, catalog # D8417). The following primary  
4 antibodies were used: Syntaxin 3 (100x) (Merck/Sigma, catalog # S5547), Syntaxin 4 (1000x) (BD  
5 Transduction Laboratories, Material # 610439). The following secondary antibodies were used: Mouse  
6 A488 (Interchim 715-545-151) and Rabbit A488 (Interchim, 711-545-152).

7 Sample were imaged using an inverted videomicroscope with deconvolution (Delta Vision – Applied  
8 Precision) equipped with Xenon lamp. Acquisition was made at 100x (pixel size = 65nm). Images acquired  
9 were deconvolved using softworx (enhanced ratio method).

10 **Statistical analysis:** All statistical analysis were made with R (R Core Team (2021)) with the help of the  
11 following packages: spatsat (Baddeley et al., 2015), raster, viridis, ggplot2, dunn.test, ape (Paradis and  
12 Schliep, 2019), imager, pracma, circular, ggpur, evmix (Hu and Scarrott, 2018), splancs, OpenImageR,  
13 minpack.lm.

14 *Hypothesis testing:* The number of cells and the number of independent repetition is indicated in the  
15 legend. Since our cells are mostly isolated when imaged, we performed only single cells analysis, each  
16 cell is considered as independent, setting the sample size. The statistical test used is indicated in the  
17 legend. Tests are always conducted in a two-sided manner and a multiple comparison correction is  
18 applied when needed. We mainly used non-parametric test (Wilcoxon test, Kruskal-Wallis test), and a  
19 parametric test (Student t-test) only when the sample size was high ( $n > 30$ ). Paired tests were used for all  
20 experiments where the same cell is imaged before and after treatment. Finally, correlation was  
21 measured by Pearson correlation coefficient and tested with a t-test.

22 *Intensity map:* The intensity function  $\lambda$  is defined by:

$$E[x \in S] = \int_S \lambda(u) du$$

23 With  $x$  a pattern of points,  $u$  coordinates,  $S$  a region of the observation window, and  $E[x \in S]$  the expected  
24 number of points in  $S$ . The intensity map was computed using spatstat function density() with Jones-  
25 Diggle improved edge correction. The intensity map can be interpreted and normalized as a density map  
26 by dividing it by the total number of points.

27 *Monte-Carlo CSR simulations:* Monte-Carlo simulations were used for 3 purposes: i) normalization and ii)  
28 generation of CSR 95% envelopes.

29 i) Several measures used depend on the cell geometry and the number of exocytosis events. Therefore,  
30 we normalized observed values by CSR simulated values. For each cell, a high number ( $n=100$ ) of Monte-  
31 Carlo simulations was run to generate CSR exocytosis maps associated with the same number of  
32 exocytosis events and the same cell geometry. The ratio between observed and average simulated  
33 values allows classifying cells in two categories: more extreme or less extreme than CSR compared to the  
34 observed measure.

1 ii) Monte-Carlo simulations were used to generate CSR envelopes. Some measures (mainly Ripley's K  
2 function) were averaged over a population of cells; therefore CSR simulations were run in the same way:  
3 Monte-Carlo CSR simulations were run for the full population of cells and the evaluated quantity is  
4 averaged over the different simulated cells. This procedure was repeated a high number of times  
5 (n=100). The CSR envelope contains 95% of these simulations.

6 *Nearest Neighbor Distance:* The Nearest Neighbor Distance (NND) of a given exocytosis event is the  
7 distance to the closest exocytosis event. These distances give information on the short scale spatial  
8 structure. NND was used to test CSR hypothesis according to the procedure presented in Lachuer *et al.*  
9 (Lachuer et al., 2020) and detailed in the Monte-Carlo section. Simulated average NND are compared to  
10 the observed NND. This allowed to classify the cell as clustered ( $NND_{\text{observed}} < NND_{\text{simulated}}$ ), or dispersed  
11 ( $NND_{\text{observed}} > NND_{\text{simulated}}$ ). Note that temporal NND were treated similarly to spatial NND, just by reducing  
12 the dimension of the analysis.

13 *Ripley's K function:* For a point pattern  $X = \{x_1, x_2, \dots, x_n\}$  where each  $x$  is point coordinates observed in an  
14 area  $|S|$ , the Ripley's K function (Ripley, 1976; Dixon, 2014) is defined as:

$$K(r) = \frac{|\Omega|}{n(n-1)} \sum_{i=1}^n \sum_{j \neq i}^n 1_{|x_i - x_j| \leq r}$$

15 This function quantifies the average number of points in a disk of radius  $r$  centered on one point. In case  
16 of CSR, this function should be close to  $\pi r^2$ . Therefore we always substrate  $\pi r^2$  to  $K(r)$ , a positive value  
17 indicates clustering whereas a negative value indicates dispersing. The spatial Ripley's K function was  
18 computed using spatstat function `Kest()` with the best edge correction possible. Ripley's K function was  
19 computed between 0 and a quarter of the cell size to avoid edge effects. All Ripley's K functions plotted  
20 are an average of a population of Ripley's K functions (+/- SEM). A permutation test (with 999  
21 permutations) based on a Studentized distance is used to compare populations thanks to the spatstat  
22 function `studpermu.test()` (Hahn, 2012). Finally, a CSR 95% envelope was computed with Monte-Carlo  
23 simulations (see corresponding section).

24 Temporal Ripley's K function  $K(t)$  is the reduction of the 2D spatial Ripley's K function in 1D. Therefore  
25 the expected value under CSR hypothesis is  $2t$ .  $K(t)$  was computed by our own function using the Ripley's  
26 edge correction following (Yunta et al., 2014). Temporal Ripley's K function was treated in the same way  
27 as the spatial one to generate the CSR 95% envelope and for the averaging.

28 Spatio-temporal Ripley's K function  $K(r,t)$  is the 3D extension of the spatial Ripley's K function that  
29 evaluates the number of neighbors in a cylinder of a radius  $r$  and a half height  $t$  (Diggle et al., 1995).  $K(r,t)$   
30 was computed using the splancs function `stkhat()`. The median  $K(r,t)$  was computed (averaging is avoided  
31 due to the generation of aberrant values by splancs). In absence of spatio-temporal coupling (*i.e.*  
32 independency of the temporal and spatial point coordinates):

$$D = K(r, t) - K(r)K(t) = 0$$

1 Thereby the independency can be evaluated by the D statistics. It can be statistically tested using a  
2 permutation test (1000 permutations) using the splancs function `stmctest()`.

3 *Distance to cell border*: Distance to cell border was computed using imager function  
4 `distance_transform()`. For each cell, the distance to cell border at exocytosis sites was measured. The  
5 distribution was computed using Kernel Density Estimation (KDE). The distribution depicted is a  
6 distribution averaged over multiples cells +/-SEM. The 95% CSR envelope was computed by Monte-Carlo  
7 simulations (see corresponding section). The solid blue line represents the average of the simulated  
8 densities.

9 The significance at the single cell level was accessed using Monte-Carlo simulations (see corresponding  
10 section). Observed cell border distances were divided by the average simulated cell border distances  
11 allowing a classification of the cells into two categories: borders-avoiding (ratio<1) or borders-linking  
12 (ratio>1).

13 *Anisotropy*: The cell was cut in 30 angular sections (from the center of mass). An angle  $\theta_i$  was associated  
14 to each section. The number of exocytosis event was computed in each section and divided by the  
15 surface of the corresponding section giving a coefficient  $w_i$  (normalized by the sum of the coefficients).  
16 The anisotropy/polarization measurement is based on the average resultant length computed as:

$$R = \frac{1}{n} \sqrt{\left(\sum_{i=1}^{30} w_i \cos(\theta_i)\right)^2 + \left(\sum_{i=1}^{30} w_i \sin(\theta_i)\right)^2}$$

17 This polarization index ranged between 0 and 1. The significance was accessed using Monte-Carlo  
18 simulations (see corresponding section). Observed average resultant lengths were divided by the  
19 average simulated resultant length allowing a classification of the cells into two categories: polarized  
20 (ratio>1) or non-polarized (ratio<1).

21 *Exocytosis-FA co-appearing index*: The average paxillin fluorescence intensity was measured at the  
22 locations of exocytosis event. The significance was accessed using Monte-Carlo simulations (see  
23 corresponding section). The comparison of the observed average intensity with simulated ones allows  
24 classifying cells with a colocalization index ( $I_{obs}/I_{sim}$ ) under two categories: co-appearing ( $I_{obs}/I_{sim}>1$ ), no-  
25 co-appearing ( $I_{obs}/I_{sim}<1$ ).

26 *Modulus distribution*: On micropatterns, exocytosis events were described with polar coordinates (with  
27 the origin at the center of the pattern). The modulus is the distance between an event and the center  
28 (normalized by the cell radius). For each cell a modulus distribution was computed using Kernel Density  
29 Estimation (KDE). To avoid boundary effects, an asymmetric beta kernel was used (Chen, 1999) using the  
30 `evmix` function `dbckden()`. The depicted modulus distribution is an average over the population +/- SEM.  
31 This distribution can be compared to the expected distribution in case of CSR:

$$p_{CSR}(r) = 2r$$

1 The 95% CSR envelope was computed using Monte-Carlo simulations (see corresponding section).  
2 Despite beta edge correction, the simulations do not fit perfectly  $p_{CSR}$ . In order to avoid any bias due to  
3 kernels, we also conducted the same analysis using empirical cumulative distributions. The empirical  
4 cumulative distribution  $P_{CSR}$  under CSR hypothesis is:

$$P_{CSR}(r) = \int_0^1 p_{CSR}(x) dx = r^2$$

5 *Fourier analysis*: Fourier analysis was conducted using Fast Fourier Transform function `fft()`. The  
6 spectrum of modulus was computed for each cell between 0 and Nyquist frequency. Modulus spectrum  
7 were averaged over the cell population.

8 *Moran's I*: Moran's I evaluates the spatial auto-correlation (Moran, 1950). We used it to evaluate the  
9 spatial structure of lifetime measurement. For an image of N pixels, the Moran's I is defined as:

$$I = \frac{N}{\sum_{i=1}^N \sum_{j=1}^N w_{i,j}} \frac{\sum_{i=1}^N \sum_{j=1}^N w_{i,j} (x_i - \bar{x})(x_j - \bar{x})}{\sum_{i=1}^N (x_i - \bar{x})^2}$$

10 With  $x_i$  the  $i^{\text{th}}$  pixel value,  $\bar{x}$  the average pixel values, and  $w_{ij}$  the inverse of the Euclidian distance  
11 between pixel  $i$  and  $j$ . This index is superior to  $-1/(N-1)$  in case of pixel clustering and inferior to in case of  
12 regular spacing (*i.e.* pixels with similar values are regularly separated). A decreased of the Moran's I  
13 should be perceived as a spatial decorrelation *i.e.* pixels are less clustered. Moran's I index was  
14 computed using `ape` function `Moran.I()` using a random subsample of pixels (Monte-Carlo random  
15 sampling scheme) to keep a decent computation time.

## 16 **Image analysis:**

17 *Exocytosis detection*: Exocytosis events were detected manually (because automatization failed to reach  
18 our exigency level). However some events were probably missed (false negative). This is not a problem,  
19 because Ripley's K function is invariant under random thinning (Baddeley et al., 2015). It is also likely that  
20 some events did not correspond to exocytosis (false positive). Due to the superposition principle  
21 (Baddeley et al., 2015), the experimental Ripley's K function is the sum of the exocytosis Ripley's K  
22 function and the one of false annotation. Therefore, under the assumption that these false annotations  
23 are random, possible false annotations could only slightly underestimates clustering.

24 *Half-life*: Fluorescence intensity was measured at exocytosis event localizations in a window of  $1.12\mu\text{m}$   
25 centered on the event through time. The intensity was divided by the intensity at the beginning of the  
26 event normalizing the exocytosis peak at 1. The intensity profile of all events in a cell was averaged. The  
27 intensity was fitted on this averaged profile over 20 frames ( $\sim 8\text{s}$ ) with a single exponential function:

$$I(t) = Ae^{-t/t_{1/2}} + B$$

28 With  $t_{1/2}$  the half-life. The fitting was performed with the `minpack.lm` function `nlsLM()`. The profile  
29 depicted is the average over multiple cells. The half-life obtained from this average curve is close to the  
30 lifetime averaged over multiple cells.

1 *Segmentation*: Cell segmentation to obtain mask or segmentation of syntaxin patches was performed  
2 using manual thresholding with ImageJ software.

3

#### 4 **Acknowledgements**

5 We are grateful to Sabine Bardin, Pallavi Mathur, David Pereira, Tarn Duong, Mathieu Coppey and Pierre  
6 Sens for fruitful discussions and/or help at the bench. We also thank Mathieu Piel lab for sharing  
7 photomasks, Thierry Galli for the VAMP7-pHluorin plasmid and syntaxin antibodies, and Marc Tramier  
8 and Giulia Bertolin for testing Flipper-TR with their FAST-FLIM. Finally, we thank (again) Thierry Galli and  
9 Christophe Lamaze for critical reading of the manuscript. The authors greatly acknowledge the Nikon  
10 Imaging Centre @ Institut Curie-CNRS, member of the French National Research Infrastructure France-  
11 Bioluminescence (ANR10-INSB-04). This work was supported by ARC (Association pour la Recherche sur le  
12 Cancer) PhD fellowship and FRM (Fondation Recherche Médicale) PhD extension fellowship.

13

#### 14 **Declaration of Interests**

15 The authors declare no competing interests.

16

17

18

19

20

21

22

23

24

25

26

27

28

## 1 **References**

- 2
- 3 Andrews, N.W., and Corrotte, M. (2018). Plasma membrane repair. *Curr. Biol.* **28**, R392–R397.  
4 <https://doi.org/10.1016/j.cub.2017.12.034>.
- 5 Arantes, R.M.E., and Andrews, N.W. (2006). A Role for Synaptotagmin VII-Regulated Exocytosis of  
6 Lysosomes in Neurite Outgrowth from Primary Sympathetic Neurons. *J. Neurosci.* **26**, 4630–4637.  
7 <https://doi.org/10.1523/JNEUROSCI.0009-06.2006>.
- 8 Azioune, A., Carpi, N., Tseng, Q., Théry, M., and Piel, M. (2010). Protein micropatterns: A direct printing  
9 protocol using deep UVs. *Methods Cell Biol.* **97**, 133–146. [https://doi.org/10.1016/S0091-](https://doi.org/10.1016/S0091-679X(10)97008-8)  
10 [679X\(10\)97008-8](https://doi.org/10.1016/S0091-679X(10)97008-8).
- 11 Ba, Q., Raghavan, G., Kiselyov, K., and Yang, G. (2018). Whole-Cell Scale Dynamic Organization of  
12 Lysosomes Revealed by Spatial Statistical Analysis. *Cell Rep.* **23**, 3591–3606.  
13 <https://doi.org/10.1016/j.celrep.2018.05.079>.
- 14 Baddeley, A., Rubak, E., and Turner, R. (2015). *Spatial Point Patterns: Methodology and Applications with*  
15 *R* (Boca Raton; London; New York: Chapman and Hall/CRC).
- 16 Biswas, A., Kashyap, P., Datta, S., Sengupta, T., and Sinha, B. (2019). Cholesterol Depletion by M $\beta$ CD  
17 Enhances Cell Membrane Tension and Its Variations-Reducing Integrity. *Biophys. J.* **116**, 1456–1468.  
18 <https://doi.org/10.1016/j.bpj.2019.03.016>.
- 19 Blandin, P., Lévêque-Fort, S., Lécart, S., Cossec, J.C., Potier, M.-C., Lenkei, Z., Druon, F., and Georges, P.  
20 (2009). Time-gated total internal reflection fluorescence microscopy with a supercontinuum excitation  
21 source. *Appl. Opt.* **48**, 553–559. <https://doi.org/10.1364/ao.48.000553>.
- 22 Bogdanovic, A., Bennett, N., Kieffer, S., Louwagie, M., Morio, T., Garin, J., Satre, M., and Bruckert, F.  
23 (2002). Syntaxin 7, syntaxin 8, Vti1 and VAMP7 (vesicle-associated membrane protein 7) form an active  
24 SNARE complex for early macropinocytic compartment fusion in *Dictyostelium discoideum*. *Biochem. J.*  
25 **368**, 29–39. <https://doi.org/10.1042/BJ20020845>.
- 26 Burgo, A., Proux-Gillardeaux, V., Sotirakis, E., Bun, P., Casano, A., Verraes, A., Liem, R.K.H., Formstecher,  
27 E., Coppey-Moisand, M., and Galli, T. (2012). A Molecular Network for the Transport of the TI-  
28 VAMP/VAMP7 Vesicles from Cell Center to Periphery. *Dev. Cell* **23**, 166–180.  
29 <https://doi.org/10.1016/j.devcel.2012.04.019>.
- 30 Chaineau, M., Danglot, L., Proux-Gillardeaux, V., and Galli, T. (2008). Role of HRB in clathrin-dependent  
31 endocytosis. *J. Biol. Chem.* **283**, 34365–34373. <https://doi.org/10.1074/jbc.M804587200>.
- 32 Chaineau, M., Danglot, L., and Galli, T. (2009). Multiple roles of the vesicular-SNARE TI-VAMP in post-  
33 Golgi and endosomal trafficking. *FEBS Lett.* **583**, 3817–3826.  
34 <https://doi.org/10.1016/j.febslet.2009.10.026>.
- 35 Chen, S.X. (1999). Beta kernel estimators for density functions. *Comput. Stat. Data Anal.* **31**, 131–145.  
36 [https://doi.org/10.1016/S0167-9473\(99\)00010-9](https://doi.org/10.1016/S0167-9473(99)00010-9).

- 1 Chen, D., Zheng, Q., Sun, L., Ji, M., Li, Y., Deng, H., and Zhang, H. (2021). ORF3a of SARS-CoV-2 promotes  
2 lysosomal exocytosis-mediated viral egress. *Dev. Cell* 56, 3250-3263.e5.  
3 <https://doi.org/10.1016/j.devcel.2021.10.006>.
- 4 Chen, G., Zhang, Z., Wei, Z., Cheng, Q., Li, X., Li, W., Duan, S., and Gu, X. (2012). Lysosomal exocytosis in  
5 Schwann cells contributes to axon remyelination. *Glia* 60, 295–305. <https://doi.org/10.1002/glia.21263>.
- 6 Cohen, A.E., and Shi, Z. (2020). Do Cell Membranes Flow Like Honey or Jiggle Like Jello? *BioEssays* 42,  
7 1900142. <https://doi.org/10.1002/bies.201900142>.
- 8 Colom, A., Derivery, E., Soleimanpour, S., Tomba, C., Molin, M.D., Sakai, N., González-Gaitán, M., Matile,  
9 S., and Roux, A. (2018). A fluorescent membrane tension probe. *Nat. Chem.* 10, 1118–1125.  
10 <https://doi.org/10.1038/s41557-018-0127-3>.
- 11 Cox, C.D., Zhang, Y., Zhou, Z., Walz, T., and Martinac, B. (2021). Cyclodextrins increase membrane tension  
12 and are universal activators of mechanosensitive channels. *Proc. Natl. Acad. Sci. U. S. A.* 118,  
13 e2104820118. <https://doi.org/10.1073/pnas.2104820118>.
- 14 Diggle, P. (1983). *Statistical Analysis of Spatial Point Patterns* (Academic Press).
- 15 Diggle, P.J., Chetwynd, A.G., Häggkvist, R., and Morris, S.E. (1995). Second-order analysis of space-time  
16 clustering. *Stat. Methods Med. Res.* 4, 124–136. <https://doi.org/10.1177/096228029500400203>.
- 17 Dixon, P.M. (2014). Ripley's K Function. In *Wiley StatsRef: Statistics Reference Online*, (John Wiley &  
18 Sons, Ltd), p.
- 19 Dou, Y., Wu, H., Li, H., Qin, S., Wang, Y., Li, J., Lou, H., Chen, Z., Li, X., Luo, Q., et al. (2012). Microglial  
20 migration mediated by ATP-induced ATP release from lysosomes. *Cell Res.* 22, 1022–1033.  
21 <https://doi.org/10.1038/cr.2012.10>.
- 22 Fernández-Chacón, R., Königstorfer, A., Gerber, S.H., García, J., Matos, M.F., Stevens, C.F., Brose, N., Rizo,  
23 J., Rosenmund, C., and Südhof, T.C. (2001). Synaptotagmin I functions as a calcium regulator of release  
24 probability. *Nature* 410, 41–49. <https://doi.org/10.1038/35065004>.
- 25 Fourriere, L., Kasri, A., Gareil, N., Bardin, S., Bousquet, H., Pereira, D., Perez, F., Goud, B., Boncompain,  
26 G., and Miserey-Lenkei, S. (2019). RAB6 and microtubules restrict protein secretion to focal adhesions. *J.*  
27 *Cell Biol.* 218, 2215–2231. <https://doi.org/10.1083/jcb.201805002>.
- 28 Fu, J., Githaka, J.M., Dai, X., Plummer, G., Suzuki, K., Spigelman, A.F., Bautista, A., Kim, R., Greitzer-Antes,  
29 D., Fox, J.E.M., et al. (2019). A glucose-dependent spatial patterning of exocytosis in human  $\beta$ -cells is  
30 disrupted in type 2 diabetes. *JCI Insight* 5, 127896. <https://doi.org/10.1172/jci.insight.127896>.
- 31 Galli, T., Zahraoui, A., Vaidyanathan, V.V., Raposo, G., Tian, J.M., Karin, M., Niemann, H., and Louvard, D.  
32 (1998). A novel tetanus neurotoxin-insensitive vesicle-associated membrane protein in SNARE complexes  
33 of the apical plasma membrane of epithelial cells. *Mol. Biol. Cell* 9, 1437–1448.  
34 <https://doi.org/10.1091/mbc.9.6.1437>.



- 1 Gauthier, N.C., Fardin, M.A., Roca-Cusachs, P., and Sheetz, M.P. (2011). Temporary increase in plasma  
2 membrane tension coordinates the activation of exocytosis and contraction during cell spreading. *Proc.*  
3 *Natl. Acad. Sci.* *108*, 14467–14472. <https://doi.org/10.1073/pnas.1105845108>.
- 4 Geuze, H.J. (1998). The role of endosomes and lysosomes in MHC class II functioning. *Immunol. Today*  
5 *19*, 282–287. [https://doi.org/10.1016/S0167-5699\(98\)01269-9](https://doi.org/10.1016/S0167-5699(98)01269-9).
- 6 Ghosh, S., Dellibovi-Ragheb, T.A., Kerviel, A., Pak, E., Qiu, Q., Fisher, M., Takvorian, P.M., Bleck, C., Hsu,  
7 V.W., Fehr, A.R., et al. (2020).  $\beta$ -Coronaviruses Use Lysosomes for Egress Instead of the Biosynthetic  
8 Secretory Pathway. *Cell* *183*, 1520-1535.e14. <https://doi.org/10.1016/j.cell.2020.10.039>.
- 9 Gundelfinger, E.D., Kessels, M.M., and Qualmann, B. (2003). Temporal and spatial coordination of  
10 exocytosis and endocytosis. *Nat. Rev. Mol. Cell Biol.* *4*, 127–139. <https://doi.org/10.1038/nrm1016>.
- 11 Gupton, S.L., and Gertler, F.B. (2010). Integrin signaling switches the cytoskeletal and exocytic machinery  
12 that drives neuritogenesis. *Dev. Cell* *18*, 725–736. <https://doi.org/10.1016/j.devcel.2010.02.017>.
- 13 Hahn, U. (2012). A Studentized Permutation Test for the Comparison of Spatial Point Patterns. *J. Am.*  
14 *Stat. Assoc.* *107*, 754–764. <https://doi.org/10.1080/01621459.2012.688463>.
- 15 Hissa, B., Oakes, P.W., Pontes, B., Ramírez-San Juan, G., and Gardel, M.L. (2017). Cholesterol depletion  
16 impairs contractile machinery in neonatal rat cardiomyocytes. *Sci. Rep.* *7*, 43764.  
17 <https://doi.org/10.1038/srep43764>.
- 18 Hoshino, D., Kirkbride, K.C., Costello, K., Clark, E.S., Sinha, S., Grega-Larson, N., Tyska, M.J., and Weaver,  
19 A.M. (2013). Exosome secretion is enhanced by invadopodia and drives invasive behavior. *Cell Rep.* *5*,  
20 1159–1168. <https://doi.org/10.1016/j.celrep.2013.10.050>.
- 21 Hu, Y., and Scarrott, C. (2018). evmix: An R package for Extreme Value Mixture Modeling, Threshold  
22 Estimation and Boundary Corrected Kernel Density Estimation. *J. Stat. Softw.* *84*, 1–27.  
23 <https://doi.org/10.18637/jss.v084.i05>.
- 24 Huynh, K.K., Kay, J.G., Stow, J.L., and Grinstein, S. (2007). Fusion, Fission, and Secretion During  
25 Phagocytosis. *Physiology* *22*, 366–372. <https://doi.org/10.1152/physiol.00028.2007>.
- 26 Kasai, H., Takahashi, N., and Tokumaru, H. (2012). Distinct initial SNARE configurations underlying the  
27 diversity of exocytosis. *Physiol. Rev.* *92*, 1915–1964. <https://doi.org/10.1152/physrev.00007.2012>.
- 28 Keller, P., Toomre, D., Díaz, E., White, J., and Simons, K. (2001). Multicolour imaging of post-Golgi sorting  
29 and trafficking in live cells. *Nat. Cell Biol.* *3*, 140–149. <https://doi.org/10.1038/35055042>.
- 30 Kliesch, T.-T., Dietz, J., Turco, L., Halder, P., Polo, E., Tarantola, M., Jahn, R., and Janshoff, A. (2017).  
31 Membrane tension increases fusion efficiency of model membranes in the presence of SNAREs. *Sci. Rep.*  
32 *7*, 12070. <https://doi.org/10.1038/s41598-017-12348-w>.
- 33 Kloepper, T.H., Kienle, C.N., and Fasshauer, D. (2007). An Elaborate Classification of SNARE Proteins  
34 Sheds Light on the Conservation of the Eukaryotic Endomembrane System. *Mol. Biol. Cell* *18*, 3463–3471.  
35 <https://doi.org/10.1091/mbc.E07-03-0193>.

- 1 Kowal, J., Tkach, M., and Théry, C. (2014). Biogenesis and secretion of exosomes. *Curr. Opin. Cell Biol.* 29,  
2 116–125. <https://doi.org/10.1016/j.ceb.2014.05.004>.
- 3 Lachuer, H., Mathur, P., Bleakley, K., and Schauer, K. (2020). Quantifying Spatiotemporal Parameters of  
4 Cellular Exocytosis in Micropatterned Cells. *J. Vis. Exp. JoVE* <https://doi.org/10.3791/60801>.
- 5 Lacombe, J., Karsenty, G., and Ferron, M. (2013). Regulation of lysosome biogenesis and functions in  
6 osteoclasts. *Cell Cycle Georget. Tex* 12, 2744–2752. <https://doi.org/10.4161/cc.25825>.
- 7 LaPlante, J.M., Sun, M., Falardeau, J., Dai, D., Brown, E.M., Slaugenhaupt, S.A., and Vassilev, P.M. (2006).  
8 Lysosomal exocytosis is impaired in mucopolipidosis type IV. *Mol. Genet. Metab.* 89, 339–348.  
9 <https://doi.org/10.1016/j.ymgme.2006.05.016>.
- 10 Lieber, A.D., Schweitzer, Y., Kozlov, M.M., and Keren, K. (2015). Front-to-Rear Membrane Tension  
11 Gradient in Rapidly Moving Cells. *Biophys. J.* 108, 1599–1603. <https://doi.org/10.1016/j.bpj.2015.02.007>.
- 12 Machado, E., White-Gilbertson, S., van de Vlekkert, D., Janke, L., Moshiach, S., Campos, Y., Finkelstein,  
13 D., Gomero, E., Mosca, R., Qiu, X., et al. (2015). Regulated lysosomal exocytosis mediates cancer  
14 progression. *Sci. Adv.* 1, e1500603. <https://doi.org/10.1126/sciadv.1500603>.
- 15 Mao, F., Yang, Y., and Jiang, H. (2021). Endocytosis and exocytosis protect cells against severe membrane  
16 tension variations. *Biophys. J.* 120, 5521–5529. <https://doi.org/10.1016/j.bpj.2021.11.019>.
- 17 Marquer, C., Devauges, V., Cossec, J.-C., Liot, G., Lécart, S., Saudou, F., Duyckaerts, C., Lévêque-Fort, S.,  
18 and Potier, M.-C. (2011). Local cholesterol increase triggers amyloid precursor protein-Bace1 clustering  
19 in lipid rafts and rapid endocytosis. *FASEB J. Off. Publ. Fed. Am. Soc. Exp. Biol.* 25, 1295–1305.  
20 <https://doi.org/10.1096/fj.10-168633>.
- 21 Martinez-Arca, S., Alberts, P., Zahraoui, A., Louvard, D., and Galli, T. (2000). Role of tetanus neurotoxin  
22 insensitive vesicle-associated membrane protein (TI-VAMP) in vesicular transport mediating neurite  
23 outgrowth. *J. Cell Biol.* 149, 889–900. <https://doi.org/10.1083/jcb.149.4.889>.
- 24 Miklavc, P., and Frick, M. (2020). Actin and Myosin in Non-Neuronal Exocytosis. *Cells* 9, 1455.  
25 <https://doi.org/10.3390/cells9061455>.
- 26 Moran, P.A.P. (1950). Notes on Continuous Stochastic Phenomena. *Biometrika* 37, 17–23.  
27 <https://doi.org/10.2307/2332142>.
- 28 Neveu, E., Khalifeh, D., Salamin, N., and Fasshauer, D. (2020). Prototypic SNARE Proteins Are Encoded in  
29 the Genomes of Heimdallarchaeota, Potentially Bridging the Gap between the Prokaryotes and  
30 Eukaryotes. *Curr. Biol. CB* 30, 2468-2480.e5. <https://doi.org/10.1016/j.cub.2020.04.060>.
- 31 Novick, P., Field, C., and Schekman, R. (1980). Identification of 23 complementation groups required for  
32 post-translational events in the yeast secretory pathway. *Cell* 21, 205–215.  
33 [https://doi.org/10.1016/0092-8674\(80\)90128-2](https://doi.org/10.1016/0092-8674(80)90128-2).
- 34 Paradis, E., and Schliep, K. (2019). ape 5.0: an environment for modern phylogenetics and evolutionary  
35 analyses in R. *Bioinformatics* 35, 526–528. <https://doi.org/10.1093/bioinformatics/bty633>.

- 1 Peters, P.J., Borst, J., Oorschot, V., Fukuda, M., Krähenbühl, O., Tschopp, J., Slot, J.W., and Geuze, H.J.  
2 (1991). Cytotoxic T lymphocyte granules are secretory lysosomes, containing both perforin and  
3 granzymes. *J. Exp. Med.* *173*, 1099–1109. <https://doi.org/10.1084/jem.173.5.1099>.
- 4 Proux-Gillardeaux, V., Raposo, G., Irinopoulou, T., and Galli, T. (2007). Expression of the Longin domain of  
5 TI-VAMP impairs lysosomal secretion and epithelial cell migration. *Biol. Cell* *99*, 261–271.  
6 <https://doi.org/10.1042/BC20060097>.
- 7 Ripley, B.D. (1976). The Second-Order Analysis of Stationary Point Processes. *J. Appl. Probab.* *13*, 255–  
8 266. <https://doi.org/10.2307/3212829>.
- 9 Saenz, J.B., Sun, W.J., Chang, J.W., Li, J., Bursulaya, B., Gray, N.S., and Haslam, D.B. (2009). Golgicide A  
10 reveals essential roles for GBF1 in Golgi assembly and function. *Nat. Chem. Biol.* *5*, 157–165.  
11 <https://doi.org/10.1038/nchembio.144>.
- 12 Samie, M.A., and Xu, H. (2014). Lysosomal exocytosis and lipid storage disorders. *J. Lipid Res.* *55*, 995–  
13 1009. <https://doi.org/10.1194/jlr.R046896>.
- 14 Schauer, K., Duong, T., Bleakley, K., Bardin, S., Bornens, M., and Goud, B. (2010). Probabilistic density  
15 maps to study global endomembrane organization. *Nat. Methods* *7*, 560–566.  
16 <https://doi.org/10.1038/nmeth.1462>.
- 17 Schiefermeier, N., Scheffler, J.M., de Araujo, M.E.G., Stasyk, T., Yordanov, T., Ebner, H.L., Offterdinger,  
18 M., Munck, S., Hess, M.W., Wickström, S.A., et al. (2014). The late endosomal p14-MP1 (LAMTOR2/3)  
19 complex regulates focal adhesion dynamics during cell migration. *J. Cell Biol.* *205*, 525–540.  
20 <https://doi.org/10.1083/jcb.201310043>.
- 21 Schmoranzer, J., Goulian, M., Axelrod, D., and Simon, S.M. (2000). Imaging Constitutive Exocytosis with  
22 Total Internal Reflection Fluorescence Microscopy. *J. Cell Biol.* *149*, 23–32. .
- 23 Schweitzer, Y., Lieber, A.D., Keren, K., and Kozlov, M.M. (2014). Theoretical Analysis of Membrane  
24 Tension in Moving Cells. *Biophys. J.* *106*, 84–92. <https://doi.org/10.1016/j.bpj.2013.11.009>.
- 25 Sebastian, R., Diaz, M.-E., Ayala, G., Letinic, K., Moncho-Bogani, J., and Toomre, D. (2006). Spatio-  
26 temporal analysis of constitutive exocytosis in epithelial cells. *IEEE/ACM Trans. Comput. Biol. Bioinform.*  
27 *3*, 17–32. <https://doi.org/10.1109/TCBB.2006.11>.
- 28 Seetharaman, S., and Etienne-Manneville, S. (2019). Microtubules at focal adhesions – a double-edged  
29 sword. *J. Cell Sci.* *132*, jcs232843. <https://doi.org/10.1242/jcs.232843>.
- 30 Shi, Z., Graber, Z.T., Baumgart, T., Stone, H.A., and Cohen, A.E. (2018). Cell Membranes Resist Flow. *Cell*  
31 *175*, 1769–1779.e13. <https://doi.org/10.1016/j.cell.2018.09.054>.
- 32 Söllner, T., Whiteheart, S.W., Brunner, M., Erdjument-Bromage, H., Geromanos, S., Tempst, P., and  
33 Rothman, J.E. (1993). SNAP receptors implicated in vesicle targeting and fusion. *Nature* *362*, 318–324.  
34 <https://doi.org/10.1038/362318a0>.
- 35 Stehbens, S., and Wittmann, T. (2012). Targeting and transport: How microtubules control focal adhesion  
36 dynamics. *J. Cell Biol.* *198*, 481–489. <https://doi.org/10.1083/jcb.201206050>.

- 1 Stehbens, S.J., Paszek, M., Pemble, H., Ettinger, A., Gierke, S., and Wittmann, T. (2014). CLASPs link focal-  
2 adhesion-associated microtubule capture to localized exocytosis and adhesion site turnover. *Nat. Cell*  
3 *Biol.* *16*, 561–573. <https://doi.org/10.1038/ncb2975>.
- 4 Südhof, T.C. (2012). The Presynaptic Active Zone. *Neuron* *75*, 11–25.  
5 <https://doi.org/10.1016/j.neuron.2012.06.012>.
- 6 Urbina, F.L., Gomez, S.M., and Gupton, S.L. (2018). Spatiotemporal organization of exocytosis emerges  
7 during neuronal shape change. *J. Cell Biol.* *217*, 1113–1128. <https://doi.org/10.1083/jcb.201709064>.
- 8 Verderio, C., Cagnoli, C., Bergami, M., Francolini, M., Schenk, U., Colombo, A., Riganti, L., Frassoni, C.,  
9 Zuccaro, E., Danglot, L., et al. (2012). TI-VAMP/VAMP7 is the SNARE of secretory lysosomes contributing  
10 to ATP secretion from astrocytes. *Biol. Cell* *104*, 213–228. <https://doi.org/10.1111/boc.201100070>.
- 11 Verweij, F.J., Bebelman, M.P., Jimenez, C.R., Garcia-Vallejo, J.J., Janssen, H., Neefjes, J., Knol, J.C., de  
12 Goeij-de Haas, R., Piersma, S.R., Baglio, S.R., et al. (2018). Quantifying exosome secretion from single  
13 cells reveals a modulatory role for GPCR signaling. *J. Cell Biol.* *217*, 1129–1142.  
14 <https://doi.org/10.1083/jcb.201703206>.
- 15 Vogel, G.F., Klee, K.M.C., Janecke, A.R., Müller, T., Hess, M.W., and Huber, L.A. (2015). Cargo-selective  
16 apical exocytosis in epithelial cells is conducted by Myo5B, Slp4a, Vamp7, and Syntaxin 3. *J. Cell Biol.* *211*,  
17 587–604. <https://doi.org/10.1083/jcb.201506112>.
- 18 Wade, N., Bryant, N.J., Connolly, L.M., Simpson, R.J., Luzio, J.P., Piper, R.C., and James, D.E. (2001).  
19 Syntaxin 7 Complexes with Mouse Vps10p Tail Interactor 1b, Syntaxin 6, Vesicle-associated Membrane  
20 Protein (VAMP)8, and VAMP7 in B16 Melanoma Cells\*. *J. Biol. Chem.* *276*, 19820–19827.  
21 <https://doi.org/10.1074/jbc.M010838200>.
- 22 Wang, G., and Galli, T. (2018). Reciprocal link between cell biomechanics and exocytosis. *Traffic* *19*, 741–  
23 749. <https://doi.org/10.1111/tra.12584>.
- 24 Wang, G., Nola, S., Bovio, S., Bun, P., Coppey-Moisan, M., Lafont, F., and Galli, T. (2018). Biomechanical  
25 Control of Lysosomal Secretion Via the VAMP7 Hub: A Tug-of-War between VARP and LRRK1. *IScience* *4*,  
26 127–143. <https://doi.org/10.1016/j.isci.2018.05.016>.
- 27 Ward, D.M., Pevsner, J., Scullion, M.A., Vaughn, M., and Kaplan, J. (2000). Syntaxin 7 and VAMP-7 are  
28 soluble N-ethylmaleimide-sensitive factor attachment protein receptors required for late endosome-  
29 lysosome and homotypic lysosome fusion in alveolar macrophages. *Mol. Biol. Cell* *11*, 2327–2333.  
30 <https://doi.org/10.1091/mbc.11.7.2327>.
- 31 Wen, P.J., Grenklo, S., Arpino, G., Tan, X., Liao, H.-S., Heureaux, J., Peng, S.-Y., Chiang, H.-C., Hamid, E.,  
32 Zhao, W.-D., et al. (2016). Actin dynamics provides membrane tension to merge fusing vesicles into the  
33 plasma membrane. *Nat. Commun.* *7*, 12604. <https://doi.org/10.1038/ncomms12604>.
- 34 Williams, K.C., McNeilly, R.E., and Coppolino, M.G. (2014). SNAP23, Syntaxin4, and vesicle-associated  
35 membrane protein 7 (VAMP7) mediate trafficking of membrane type 1-matrix metalloproteinase (MT1-  
36 MMP) during invadopodium formation and tumor cell invasion. *Mol. Biol. Cell* *25*, 2061–2070.  
37 <https://doi.org/10.1091/mbc.E13-10-0582>.

- 1 Xu, J., Toops, K.A., Diaz, F., Carvajal-Gonzalez, J.M., Gravotta, D., Mazzone, F., Schreiner, R., Rodriguez-  
2 Boulan, E., and Lakkaraju, A. (2012). Mechanism of polarized lysosome exocytosis in epithelial cells. *J.*  
3 *Cell Sci.* *125*, 5937–5943. <https://doi.org/10.1242/jcs.109421>.
- 4 Yuan, T., Lu, J., Zhang, J., Zhang, Y., and Chen, L. (2015). Spatiotemporal detection and analysis of  
5 exocytosis reveal fusion “hotspots” organized by the cytoskeleton in endocrine cells. *Biophys. J.* *108*,  
6 251–260. <https://doi.org/10.1016/j.bpj.2014.11.3462>.
- 7 Yunta, M.L., Lagache, T., Santi-Rocca, J., Bastin, P., and Olivo-Marin, J.-C. (2014). A statistical analysis of  
8 spatial clustering along cell filaments using Ripley’s K function. In 2014 IEEE 11th International  
9 Symposium on Biomedical Imaging (ISBI), pp. 541–544.
- 10 Zwiewka, M., Nodzyński, T., Robert, S., Vanneste, S., and Friml, J. (2015). Osmotic Stress Modulates the  
11 Balance between Exocytosis and Clathrin-Mediated Endocytosis in *Arabidopsis thaliana*. *Mol. Plant* *8*,  
12 1175–1187. <https://doi.org/10.1016/j.molp.2015.03.007>.

13

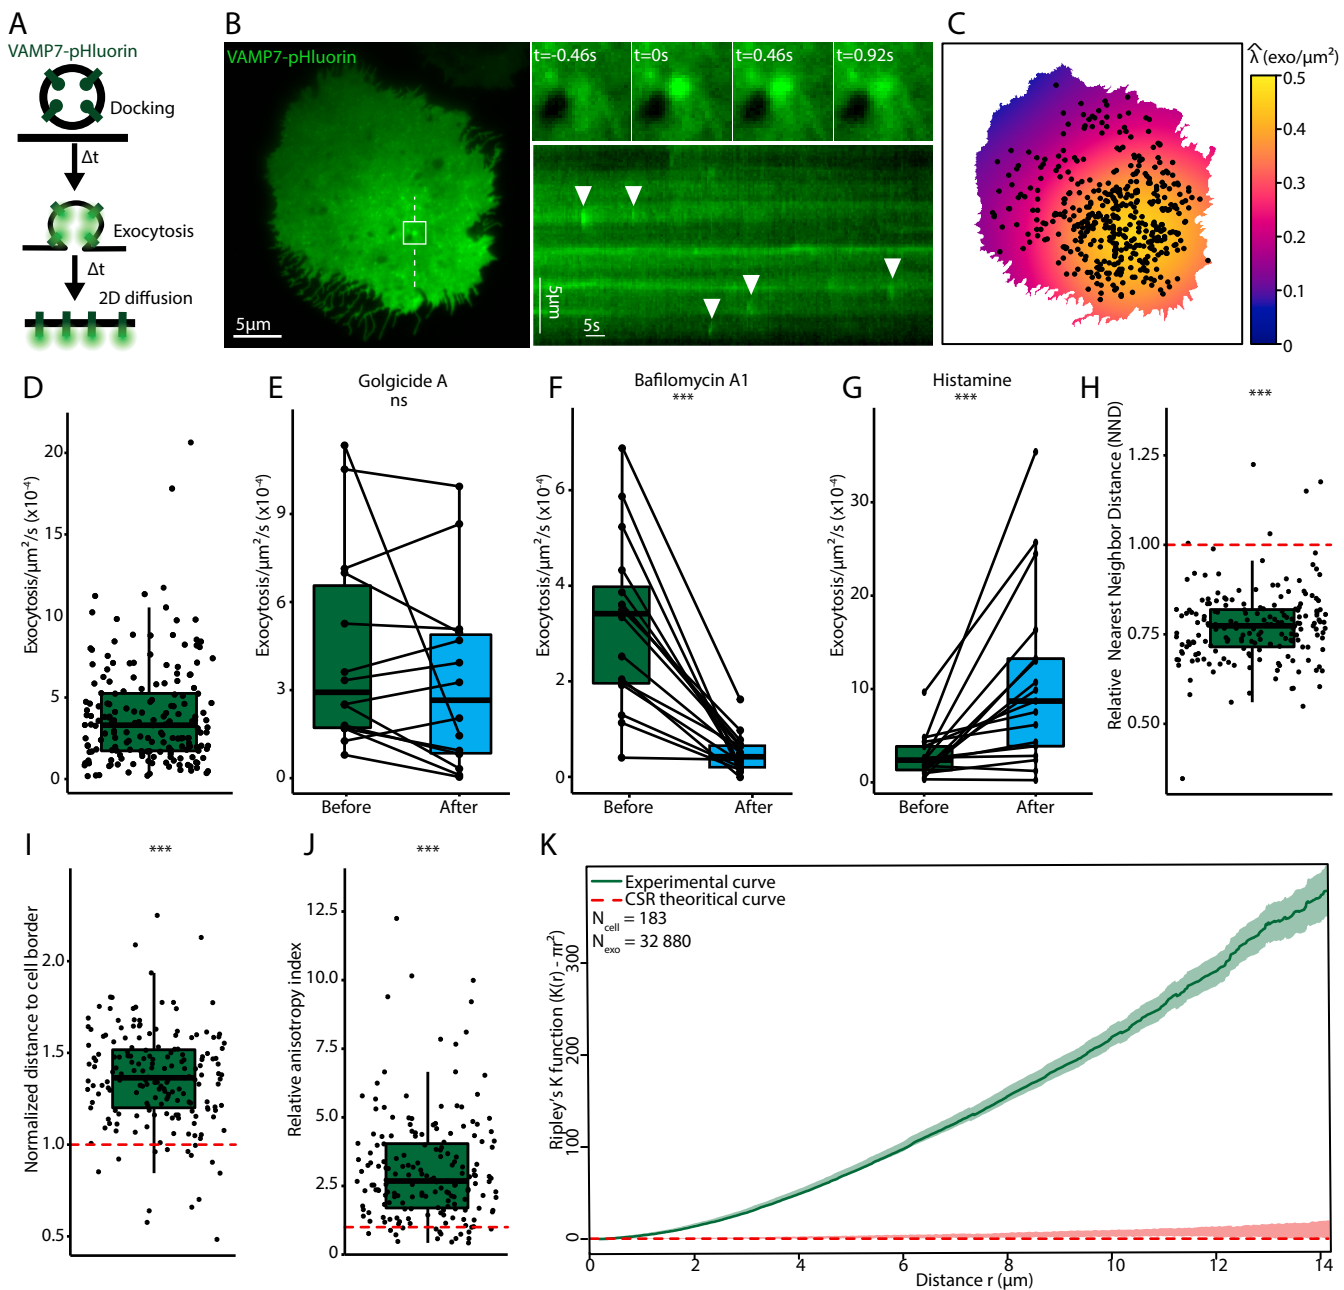

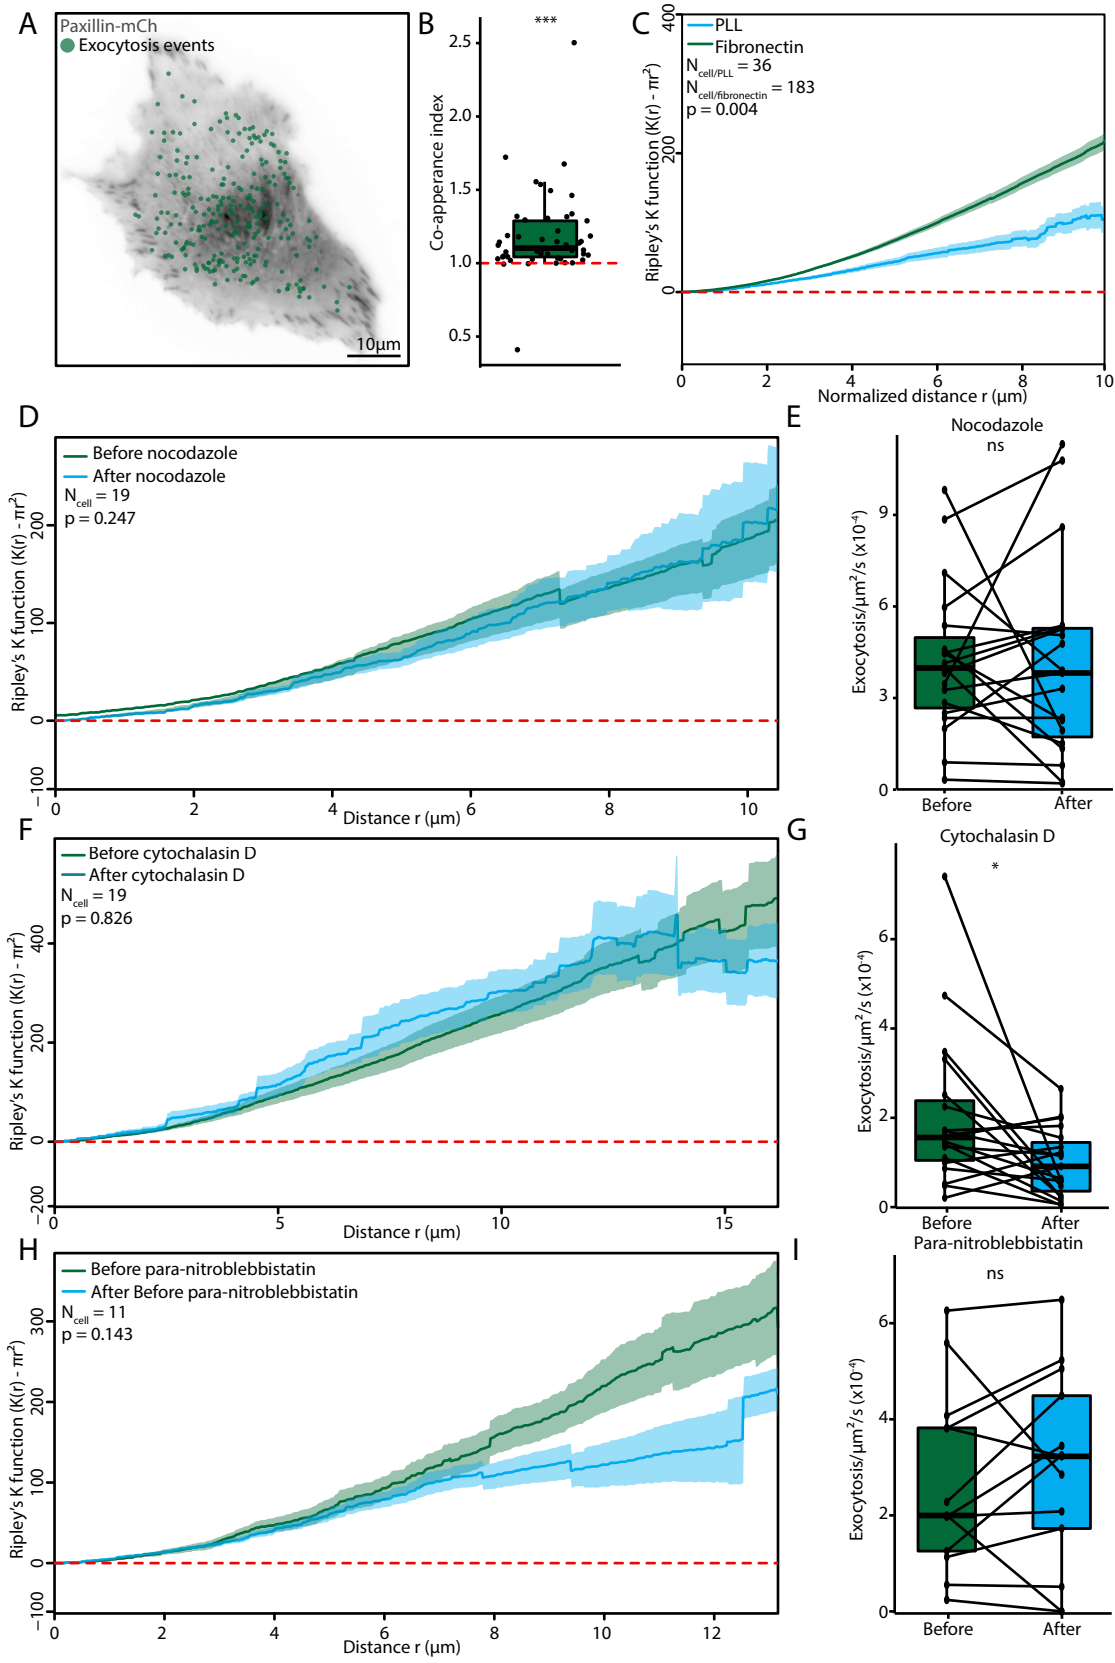

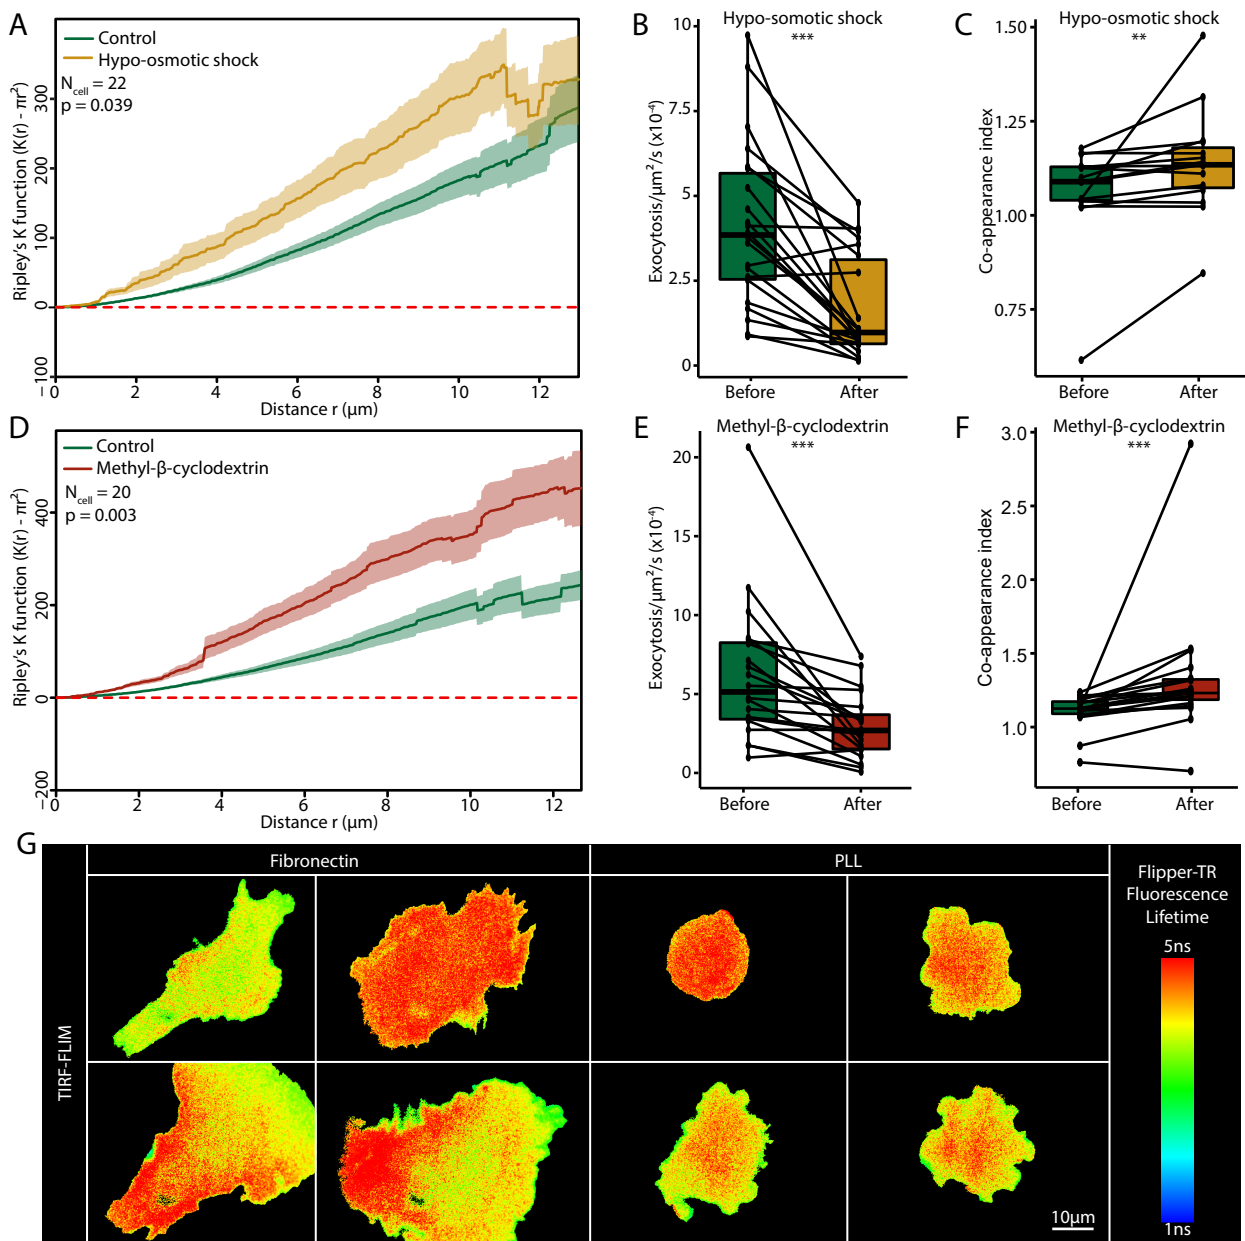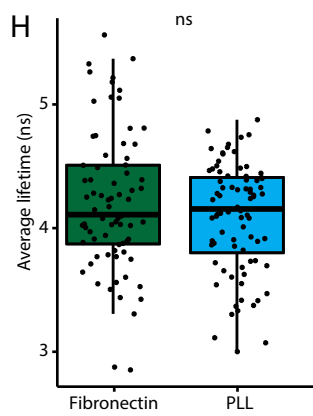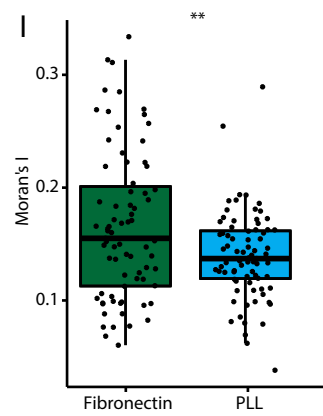



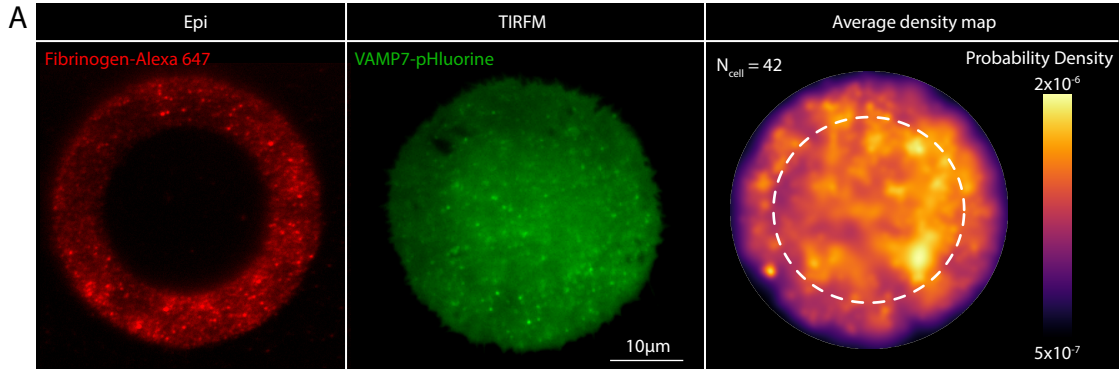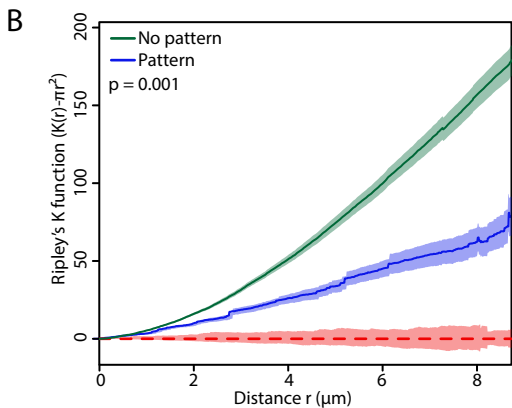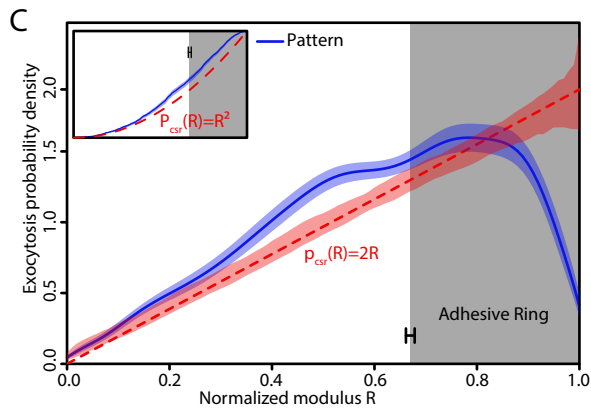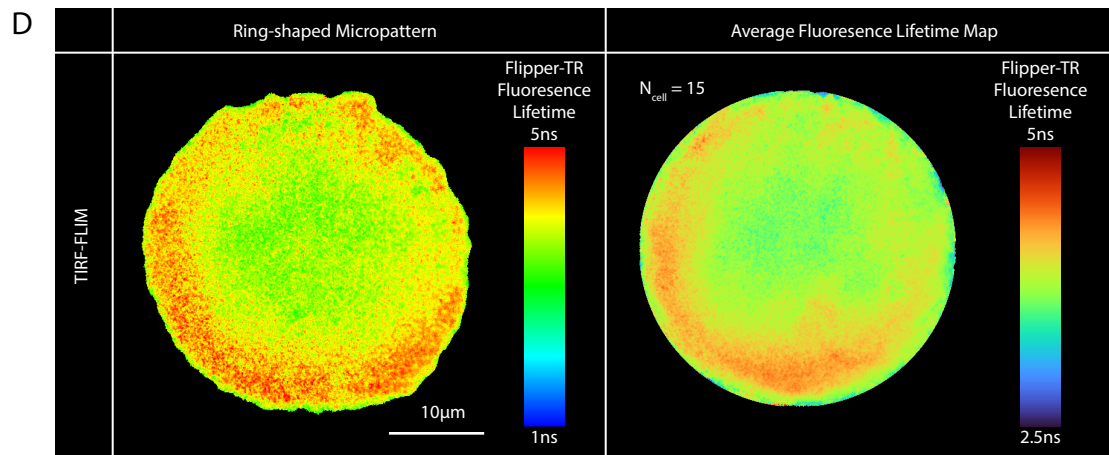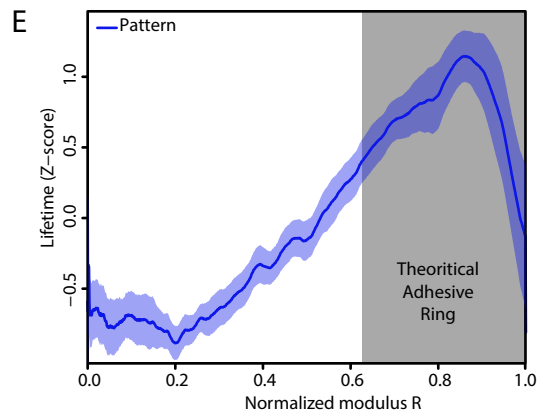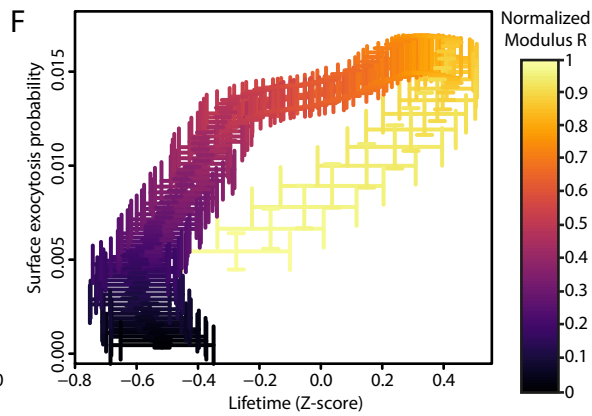

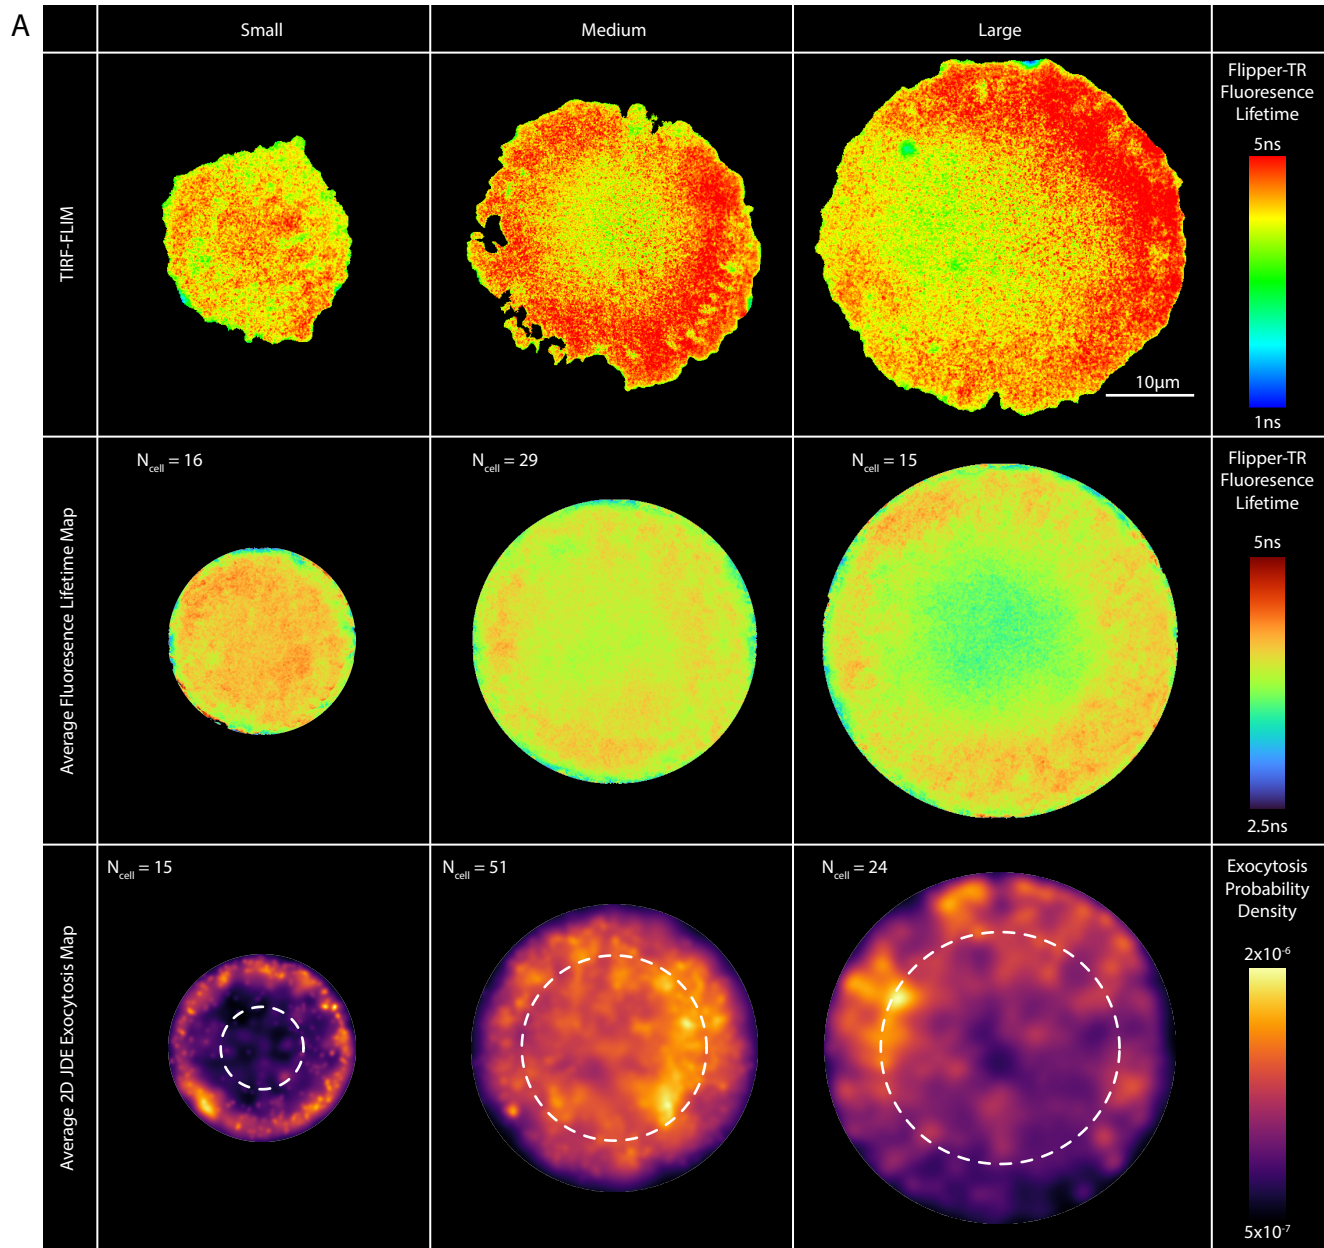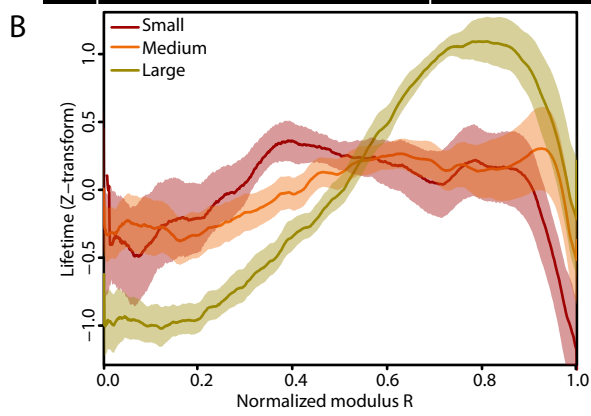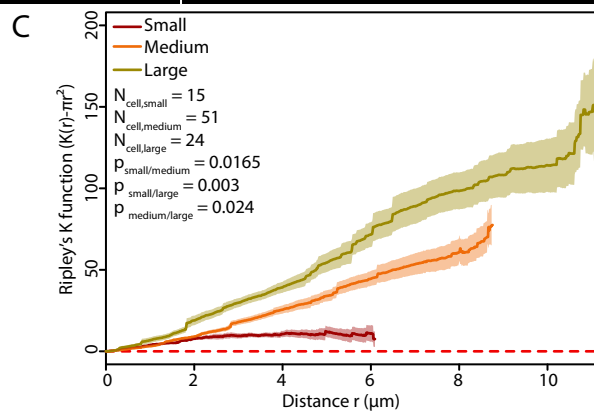

Source: https://www.biorxiv.org/content/biorxiv/early/2022/04/22/2022.04.22.489160.full.pdf
